19

## 20 **Abstract**

21 The steps of sex chromosome evolution are often thought to follow a predictable pattern and tempo, but  
22 few studies have examined how the outcomes of this process differ between closely related species with  
23 homologous sex chromosomes. The sex chromosomes of the threespine stickleback (*Gasterosteus*  
24 *aculeatus*) and Japan Sea stickleback (*G. nipponicus*) have been well characterized. Little is known,  
25 however, about the sex chromosomes in their distantly related congener, the blackspotted stickleback (*G.*  
26 *wheatlandi*). We used pedigrees of interspecific crosses to obtain the first phased X and Y genomic  
27 sequences from blackspotted sticklebacks. Using novel statistical methods, we demonstrate that the oldest  
28 stratum of the *Gasterosteus* sex chromosomes evolved on Chromosome 19 in the ancestor of all three  
29 species. Despite this shared ancestry, the sex chromosomes of the blackspotted stickleback have  
30 experienced much more extensive recombination suppression, XY differentiation, and Y degeneration  
31 than those of the other two species. The ancestral blackspotted stickleback Y chromosome fused with  
32 Chromosome 12 less than 1.4 million years ago, which may have been favored by the very small size of  
33 the recombining region on the ancestral sex chromosome. Recombination is also suppressed between the  
34 X and Y over the bulk of Chromosome 12, although it has experienced little degeneration. These results  
35 demonstrate that sex chromosome evolution does not always follow a predictable tempo.

36

## 37 **Introduction**

38 Sex chromosome evolution is thought to typically proceed via a stereotypical pathway (Charlesworth  
39 1991; Charlesworth et al. 2005; Bachtrog 2006; Wright et al. 2016; Abbott et al. 2017; Vicoso 2019).  
40 First, an autosome becomes a sex chromosome when the autosome acquires a sex-determining gene. This  
41 can occur via a turnover event in which it gains a novel mutation or a translocation from the ancestral sex  
42 chromosome (Tanaka et al. 2007; van Doorn and Kirkpatrick 2007; van Doorn and Kirkpatrick 2010;  
43 Yano et al. 2012; Kikuchi and Hamaguchi 2013). Alternatively, sex chromosome formation can entail a  
44 fusion between an existing sex chromosome and an autosome (Charlesworth and Charlesworth 1980;  
45 Pennell et al. 2015; Matsumoto and Kitano 2016). Second, recombination is suppressed between the new  
46 X and Y (or Z and W) chromosomes, for example by an inversion (Rice 1987; Bergero and Charlesworth  
47 2009; Charlesworth 2017). This non-recombining region is termed the sex determining region (SDR),  
48 while the segment that continues to recombine is termed the pseudoautosomal region (PAR). Various  
49 forms of selective interference then cause the SDR on the Y (or W) to degenerate via the accumulation of  
50 repeat elements, deletions, and pseudogenes (Rice 1994; Charlesworth and Charlesworth 2000; Graves  
51 2006; Bachtrog 2008; Bachtrog 2013). As the SDR degenerates, the sex chromosomes become  
52 heteromorphic (i.e., different in size). Finally, the SDR expands via stepwise loss of recombination along  
53 the sex chromosome, e.g., due to sequential fixation of overlapping inversions (Lahn and Page 1999;  
54 Handley et al. 2004; Bergero and Charlesworth 2009; Zhou et al. 2014). This process results in  
55 “evolutionary strata” characterized by different degrees of XY differentiation and Y degeneration.

56 Rates of sex chromosome differentiation and degeneration can vary substantially. The Y  
57 chromosomes of *Drosophila miranda* and *Silene latifolia* degenerated greatly in 1 and 10 million years,  
58 or approximately 36 million and 7 million generations respectively (Bachtrog 2008; Papadopulos et al.  
59 2015). In contrast, the X and Y chromosomes of the fugu (*Takifugu rubripes*) are at least 2 million years  
60 old (approximately 1 million generations), but differ only by a single nucleotide (Kamiya et al. 2012).  
61 Rates of sex chromosome degeneration also differ between primates and between birds, even in  
62 homologous strata (Hughes et al. 2005; Zhou et al. 2014). Few studies, however, have quantified the rates  
63 of sex chromosome differentiation and degeneration in congeners with young sex chromosomes. Those  
64 that have either relied on few molecular markers (e.g., Fujito et al. 2015) or failed to explicitly test  
65 whether the Y chromosomes in their study species are homologous or evolved independently (Darolti et  
66 al. 2019).

67 Demonstrating that the same chromosome pair determines sex in sister species is not sufficient to  
68 establish homology. The same chromosome can independently become sex-linked in multiple species.

69 Alternatively, a turnover event in which a copy of the X chromosome evolves into new Y chromosome in  
70 one species will reset the clock of sex chromosome differentiation and Y degeneration while retaining the  
71 same sex-linked chromosome pair (Blaser et al. 2013). Understanding the origins and ages of the sex  
72 chromosomes of different species is therefore required to properly compare their tempos of sex  
73 chromosome evolution

74 Stickleback fishes (family Gasterosteidae) show extraordinary variation in sex determination  
75 (Fig. 1). They have experienced sex chromosome turnovers (Ross et al. 2009), transitions between XY  
76 and ZW sex determination (Chen and Reisman 1970; Ross et al. 2009; Natri et al. 2019), fusions between  
77 sex chromosomes and autosomes (Kitano et al. 2009; Ross et al. 2009; Yoshida et al. 2014; Dagilis 2019),  
78 and the origin of sex chromosomes by introgression (Dixon et al. 2018; Natri et al. 2019). As a result,  
79 nearly every species possesses different sex chromosomes.

80 Despite frequent turnovers in other stickleback genera, Chr 19 determines sex in all three  
81 *Gasterosteus* species (Peichel et al. 2004; Kitano et al. 2009; Ross et al. 2009). The sex chromosomes in  
82 the threespine stickleback (*Gasterosteus aculeatus*) have been well characterized (Ross and Peichel 2008;  
83 Leder et al. 2010; Roesti et al. 2013; Schultheiß et al. 2015; White et al. 2015; Peichel et al. *in press*).  
84 They comprise a 2.5 Mb PAR and a 16 Mb SDR containing three strata, one of which is highly  
85 degenerated on the Y (Roesti et al. 2013; White et al. 2015; Peichel et al. *in press*). The closely-related  
86 Japan Sea stickleback (*G. nipponicus*) shares those three strata on Chr 19, indicating that recombination  
87 ceased in their common ancestor (Dagilis 2019). More recently, the ancestral Y (Chr 19) fused with Chr 9  
88 in the Japan Sea stickleback. The resulting neo-Y chromosome now carries an additional 13.7 Mb SDR  
89 that has experienced little degeneration (Kitano et al. 2009; Natri et al. 2013; Yoshida et al. 2014;  
90 Yoshida et al. 2017; Dagilis 2019).

91 Much less is known about sex chromosomes in the blackspotted stickleback (*G. wheatlandi*).  
92 Using cytogenetics, Ross et al. (2009) showed that the Y chromosome comprises a fusion between Chr 19  
93 and Chr 12 (Ross et al. 2009). They also identified nine sex-linked microsatellite markers on these two  
94 chromosomes. The Y-linked alleles of all five markers on Chr 19 did not amplify, suggesting that a wide-  
95 region of the SDR on this chromosome has degenerated. Successful amplification of markers on Chr 12  
96 suggests that chromosome became sex-linked more recently. The blackspotted stickleback, however, has  
97 not been previously studied at the genomic level. Thus, it remains unclear whether Chr 19 was the sex  
98 chromosome in the common ancestor of all *Gasterosteus*, or whether it independently evolved into a sex  
99 chromosome in multiple species. Chr 12 also determines sex in the more distantly-related ninespine  
100 stickleback (*Pungitius pungitius*), and is another candidate for the ancestral sex chromosome in  
101 *Gasterosteus* (Ross et al. 2009; Shapiro et al. 2009; Dixon et al. 2018; Natri et al. 2019).

102           In this paper, we present the first genomic investigation of the blackspotted stickleback sex  
103 chromosomes. Using phased genome sequences obtained from pedigreed crosses, we find that the  
104 blackspotted stickleback X and Y are highly differentiated along nearly the entire length of Chr 19, and  
105 that the entire SDR on Chr 19 exhibits extreme Y degeneration. This situation is in stark contrast to that  
106 in the threespine and Japan Sea sticklebacks, where extreme degeneration is limited to the oldest stratum  
107 on Chr 19. The fused neo-Y of Chr 12 in blackspotted stickleback also contains a large SDR that shows  
108 relatively little degeneration. This fusion occurred recently and independently of its recruitment as a sex  
109 chromosome in ninespine stickleback. We conclusively demonstrate homology between the ancestral  
110 blackspotted and Japan Sea stickleback Y chromosomes (Chr 19) using two approaches: a novel method  
111 for detecting shared duplications onto the Y, and a gene-tree based approach. Thus, the extensive  
112 differentiation between the blackspotted X and Y evolved over the same time scale as the more limited  
113 differentiation seen in the threespine and Japan Sea sex chromosomes. We conclude that evolution of  
114 young sex chromosomes does not always follow a predictable mode or tempo even when species share  
115 the same ancestral sex chromosome.

116

## 117 **Results**

118       We obtained phased sequences of X and Y chromosomes from 15 interspecific crosses, each consisting of  
119 a blackspotted stickleback father, a threespine stickleback mother, one daughter, and one son. All four  
120 members of each family were shotgun sequenced, and the haploid genome sequences of the blackspotted  
121 father's X-bearing and Y-bearing sperm were determined from patterns of transmission (see also Sardell  
122 et al. 2018; Dagilis 2019). In this way, we sequenced 15 independent blackspotted X chromosomes and  
123 15 independent blackspotted Y chromosomes. All reads were mapped to the repeat-masked version of the  
124 threespine stickleback reference genome (Glazer et al. 2015). This reference was produced from a female  
125 and so lacks a sequence for the Y. We did not map reads to the recently-published threespine stickleback  
126 Y reference sequences (Peichel et al. *in press*) for reasons described in the 'Sequence assembly & SNP  
127 calling' section of the Materials and Methods. All genome positions given for data from the blackspotted  
128 stickleback refer to the threespine reference.

129       SDRs often show two patterns (Vicoso and Bachtrog 2015; Palmer et al. 2019). First, lack of  
130 recombination allows the X and Y to accumulate lineage-specific mutations, leading to differentiation  
131 between them, as seen (for example) by elevated  $F_{ST}$ . Second, as the sequences of the X and Y continue  
132 to diverge, some Y-linked reads will not map to the X chromosome reference, particularly when deletions  
133 or repeat elements accumulate on the Y. Consequently, the mean read depth across the sex chromosomes

134 will be lower in males than in females, and the ratio of read depths in males vs. females (hereafter termed  
135 “read depth ratio”) will decrease.

136 SDRs also exhibit a property that we call XY monophyly (Dixon et al. 2018; Toups et al. 2019). If  
137 fixation of an inversion on the Y causes the SDR to expand, lack of recombination between the X and Y  
138 causes all Y sequences and no X sequences within the SDR to descend from a single ancestor’s  
139 chromosome in which inversion first occurred. That is, gene trees will show the Ys falling within a  
140 monophyletic clade with respect to the Xs. The Xs will also be reciprocally monophyletic if enough time  
141 has passed for them to coalesce since the inversion fixed. The argument works conversely when an  
142 inversion is fixed on the X, and it applies equally to any mechanism that completely blocks recombination  
143 between the X and Y. In gene trees from the PAR, historical recombination in the sampled population  
144 causes sequences from the Xs and Ys to be intermingled.

145

#### 146 The SDR on the ancestral sex chromosome (Chr 19)

147 Our results for Chr 19 show that the SDR spans nearly the entire chromosome, that the X and Y are  
148 highly differentiated, and that the Y is highly degenerate (Figs. 2 and 3). More SNPs have a read depth  
149 ratio nearer to 0.5 than to 1.0 on Chr 19 (Fig. 2A). This result is commonly interpreted as a signal of  
150 extensive Y degeneration (e.g., Roesti et al. 2013; Vicoso and Bachtrog 2013; Zhou et al. 2014; Darolti et  
151 al. 2019; Palmer et al. 2019). It indicates that many regions present on the X have been deleted from the  
152 Y and/or that many reads from the Y have diverged from the X to the point where they fail to map to the  
153 X reference scaffold. Plotting the read depth ratio along the chromosome demonstrates that the highly  
154 degenerate region of the SDR spans nearly all of Chr 19 (Fig. 2B). Mean  $F_{ST}$  between the X and Y is also  
155 highly elevated over nearly the entire chromosome (Fig. 3A). XY monophyly confirms that much of Chr  
156 19 is non-recombining (Fig. 3B). Among the 100 Kb windows in the SDR, 74% (150/203) exhibit X  
157 monophyly, as expected if recombination between the X and Y ceased long ago or if an inversion recently  
158 swept to fixation on the X. Patterns of Y monophyly are noisier, with 46% (94/203) of windows in the  
159 SDR exhibiting monophyly. Windows exhibiting incomplete Y or X monophyly within the SDR likely  
160 reflect genotyping and phasing errors in regions with high Y degeneration, as hemizyosity in males  
161 causes SNP calling tools and phasing algorithms to erroneously impute X alleles onto the Y (see  
162 Materials and Methods). We applied several bioinformatic filters to discard hemizygous regions, but  
163 some may still be represented in our data set. Windows with incomplete Y monophyly may also have  
164 resulted from rare gene conversion events.

165 A small region (400 Kb, or about 2% of the chromosome) at the end of Chr 19 distal to the fusion  
166 is a PAR. Read depth between sons and daughters is nearly equal here (Fig. 2B), and most windows have  
167 low  $F_{ST}$  between the X and Y (Fig. 3A). The gene trees in this region do not exhibit X or Y monophyly,  
168 indicating that it continues to recombine (Fig. 3B).

169 Read depth ratios vary along the SDR on Chr 19, which may indicate the presence of strata (Fig.  
170 2B). We identified putative strata using an algorithm that detects change points in the read depth ratio data  
171 (Killick and Eckley 2014). This method groups Region 1, which spans from 12.5 Mb to the fusion and  
172 corresponds to the oldest stratum in threespine stickleback (Roesti et al. 2013; White et al. 2015; Peichel  
173 et al. *in press*), with Region 2 (4.8 - 12.5 Mb). Both show extensive Y degeneration, having mean read  
174 depth ratios close to 0.5, and are only revealed to be different strata by multi-species gene trees (see  
175 below). The read depth ratios in Regions 3 (2.6 - 4.8 Mb) and 4 (0.4 - 2.6 Mb) are reduced to a lesser  
176 degree. Another pattern emerges, however, when we examine males and females separately: the read  
177 depth is notably less in Regions 3 and 4 relative to Regions 1 and 2 in females, but consistently low in  
178 males (Fig. 2C). This is surprising because Y degeneration should only affect read depths in males.

179 Genomic divergence between the X and Y at synonymous site ( $d_S$ ) also varies between putative  
180 strata on Chr 19, as expected if they stopped recombining at different times (Supp. Fig. S1). Notably,  
181 genes in Region 4 have significantly lower mean  $d_S$  than genes in Regions 1, 2, and 3 based on Mann-  
182 Whitney  $U$  tests ( $p \leq 10^{-13}$ ). Genes in Region 3 have significantly lower  $d_S$  than genes in Regions 2 ( $p =$   
183  $10^{-6}$ ), but not lower than Region 1 after accounting for multiple comparisons ( $p = 0.01$ ). Genes in Region  
184 2 have significantly higher  $d_S$  than genes in Region 1 ( $p = 0.0005$ ). Genomic divergence between the X  
185 and Y at nonsynonymous sites ( $d_N$ ) exhibits similar patterns across these regions (Supp. Fig. S2A), with  
186 statistically significant differences between all regions ( $p < 10^{-6}$ ) except Regions 1 and 2 ( $p = 0.03$ ). The  
187  $d_N/d_S$  ratio between the Xs and Ys is similar across most regions (Supp. Fig. S2B), and only genes in  
188 Regions 1 and 3 are significantly different after controlling for multiple comparisons (0.90 vs. 1.13,  $p =$   
189 0.001).

190 We estimated the ages of the putative strata by comparing  $d_S$  between the blackspotted  
191 stickleback X and Y to  $d_S$  between the blackspotted and threespine stickleback X chromosomes in each  
192 region, using 14.3 million years as the estimated date of the speciation event (Varadharajan et al. 2019).  
193 Based on this approach, Regions 1 and 3 both stopped recombining around the time of the species split.  
194 We estimate that Regions 2 and 4 have been non-recombining for approximately 12.3 and 10.5 million  
195 years, respectively.

196 We calculated several additional population genetics statistics for the sex chromosomes.  
197 Molecular diversity ( $\pi$ ) on Chr 19 is very low on both the X and Y chromosomes (Fig. 3D). Tajima's  $D$  is  
198 strongly negative across the Y (Fig. 3C), suggesting that the Y recently experienced a selective sweep,  
199 consistent with the spread of the fusion that formed the neo-Y. Tajima's  $D$  is close to 0 on the X (Fig.  
200 3C), and is significantly lower than values for the autosomes (range 0.53 - 0.59). Together these results  
201 suggest that the X has also recently experienced one or more selective sweeps, while the strongly positive  
202 value of Tajima's  $D$  on the autosomes implies that the species' population size has recently decreased.

203

#### 204 The SDR on the neo-sex chromosome (Chr 12)

205 Different patterns emerge on the neo-sex chromosome, Chr 12, where an autosome has fused to the Y  
206 chromosome (Chr 19). This fusion resulted in a doubling of the size of the Y, as Chrs 12 and 19 are both  
207 approximately 20 Mb. Y monophyly clearly shows that the SDR has expanded across most of Chr 12,  
208 extending 16.4 Mb from the fusion (Region 5). Lack of complete X monophyly in most regions of the  
209 SDR indicates that recombination between the X and Y in Region 5 was recently suppressed (*i.e.*, on the  
210 order of  $2N_e$  generations ago) (Fig. 3F). The mean read depth ratio in the SDR is nearly equal to its value  
211 on autosomes, indicating that the neo-Y is young and has not degenerated much (Supp. Fig. 3). Values of  
212  $d_s$  between the X and Y within the SDR of Chr 12 are low and indicate that a single stratum evolved less  
213 than 1.4 million years ago (Supp. Fig. S1). This is likely an overestimate for the age of the SDR because  
214 the X clade is polyphyletic with respect to the Ys across much of the SDR (Fig. 3F). Thus, the most  
215 recent common ancestor of all Y and X chromosomes predates the formation of the SDR on Chr 12. The  
216 PAR makes up the remaining 4.4 Mb of the chromosome distal to the fusion, as shown by low values of  
217  $F_{ST}$  between the X and Y (Fig. 3E) and the lack of monophyly of either X or Y chromosomes (Fig. 3F).  
218 Thus, the blackspotted Y has two PARs, a small one on the end of Chr 19 and larger one on the end of  
219 Chr 12.

220 Population genetics statistics for the Chr 12 neo-sex chromosomes reveal recent evolution of the  
221 neo-Y and neo-X. The neo-Y SDR exhibits nearly no polymorphism (Fig. 3H) and Tajima's  $D$  is strongly  
222 negative across its length (Fig. 3G). These patterns are consistent with a very recent sweep, potentially  
223 associated with the Y fusion or expansion of the SDR. Molecular diversity within the SDR of Chr 12 is  
224 much higher on the neo-X than on the X of Chr 19 and is slightly lower than the autosomes (Fig. 3H).  
225 Tajima's  $D$  is larger on the neo-X than the autosomes (Fig 3G). That result is consistent with the 25%  
226 reduction in population size that it experienced after the fusion changed it from an autosome to an X.

227



228 The Y chromosome originated in the *Gasterosteus* ancestor

229 The degree of X-Y divergence and Y degeneration on Chr 19 are dramatically greater in the blackspotted  
230 sticklebacks than in the other two species of *Gasterosteus* that have been studied on a genomic level  
231 (Ross and Peichel 2008; Leder et al. 2010; Natri et al. 2013; Roesti et al. 2013; Yoshida et al. 2014;  
232 Schultheiß et al. 2015; White et al. 2015; Yoshida et al. 2017; Dagilis 2019; Peichel et al. *in press*). One  
233 hypothesis is that their Y chromosomes are not homologous, and the blackspotted Y is much older. We  
234 used two approaches to falsify that hypothesis. The first is based on a new method that identifies shared  
235 genomic rearrangements, and the second uses an analysis of gene trees. The results show clearly that the  
236 oldest stratum of the Y chromosome (Region 1 on Chr 19) evolved in the common ancestor of all three  
237 *Gasterosteus* species.

238

239 *Shared duplications onto the Y chromosome*

240 Homology between Y chromosomes can be inferred from shared Y-specific chromosomal  
241 rearrangements. Bissegger *et al.* (2019) discovered that at least 38 small autosomal regions have been  
242 duplicated onto the Y chromosome SDR in threespine stickleback. These regions appear to have extreme  
243 differentiation (e.g.,  $F_{ST}$ ) between males and females on autosomes, which is an artifact that results when  
244 sequencing reads from duplicated regions on the Y chromosome mismap to their autosomal paralogs.

245 Exploiting that discovery, we asked if autosome-to-Y duplicates are shared between blackspotted  
246 sticklebacks and other *Gasterosteus* species. We first calculated  $F_{ST}$  between paternally inherited  
247 sequences for sons vs. daughters in 10 Kb windows across all autosomes in our blackspotted stickleback  
248 pedigrees. We then calculated  $F_{ST}$  across the same windows for a comparable set of pedigrees involving  
249 Japan Sea stickleback males studied by Dagilis (2019). Considering those windows whose  $F_{ST}$  values fall  
250 in the top 2% of the distribution, we find that 183 outlier windows are shared between blackspotted and  
251 Japan Sea sticklebacks. This number is far greater than expected by chance ( $n = 14$ ,  $p < 0.00001$ , chi-  
252 squared test). Of these windows, 98 have SNPs shared by both species. Three of these windows contain  
253 multiple SNPs where both species have high  $F_{ST}$  ( $> 0.25$ ) between the X and Y and the same male-  
254 specific allele (Fig. 4). These SNPs, which we refer to as “homologous Y duplicates”, provide very strong  
255 evidence that these three regions were duplicated from the autosomes to the Y in the ancestor of  
256 blackspotted and Japan Sea sticklebacks (Fig. 4). Intriguingly, one of the windows (17.15 to 17.16 Mb on  
257 Chr 8) contains the ortholog to the putative male-determining gene (*Amhy*) in threespine stickleback,  
258 which arose by a duplication from Chr 8 to Chr 19 (Peichel et al. *in press*). This finding suggests that all  
259 *Gasterosteus* species share the same master sex determining gene.

260 The homologous Y duplicates within these three windows show additional features consistent with  
261 autosome-to-Y duplications. Read depth is consistently higher in males than females (Supp. Fig. S4A), as  
262 expected if males have one or more Y duplicates in addition to the autosomal paralog. Reads containing  
263 the male-specific alleles for these SNPs typically comprise much less than half of the total reads mapping  
264 to the region (Supp. Fig. S4B). This pattern is expected when a mutation fixes in the Y paralog, since  
265 there are twice as many copies of the autosomal paralog in the genome. Finally, we find that the high  $F_{ST}$   
266 regions in each of these three windows BLAST with high similarity to at least one region in the  
267 threespine stickleback Y reference (Peichel et al. *in press*), but not to any other region on the autosomes  
268 or X chromosome in the reference genome. All these data are strong evidence that these SNPs fall within  
269 regions that duplicated onto the Y chromosome from autosomes in the common ancestor of *Gasterosteus*  
270 sticklebacks.

271

## 272 *Gene trees*

273 Different hypotheses for the evolution of sex chromosomes predict different gene tree topologies (Dixon  
274 et al. 2018). If a non-recombining sex chromosome evolved in the common ancestor of two species, then  
275 their Y chromosomes will be more closely related to each other than to the X chromosomes of their own  
276 species (Fig. 5A). Conversely, if their sex chromosomes arose from autosomes independently, then each  
277 Y chromosome will be most closely related to the X chromosome from the same species (Fig. 5B).  
278 Finally, if the Y in one species arose from an X chromosome, then the new Y will form a clade with the X  
279 chromosome in that species, which will in turn be sister to the X chromosome from the other species (Fig.  
280 5C).

281 We determined the evolutionary history of the *Gasterosteus* sex chromosomes by constructing  
282 gene trees for non-overlapping 100 Kb windows. The sequence data come from two sets of pedigrees.  
283 From this study, we used four phased X and four phased Y chromosomes from the blackspotted  
284 stickleback fathers and eight phased X chromosomes from the threespine stickleback mothers. From a  
285 previous study by Dagilis (2019), we used four phased X and four phased Y chromosomes from Japan  
286 Sea stickleback fathers and eight X chromosomes from threespine stickleback mothers. As an outgroup,  
287 we included a Chr 19 from a ninespine stickleback that was computationally phased by Dixon et al.  
288 (2018).

289 Two topologies dominate the gene trees in the SDR of Chr 19 (Fig. 6). In Region 1, the most  
290 common topology is one in which the blackspotted Ys are sister to the Japan Sea Ys, and the blackspotted  
291 Xs are sister to the Japan Sea Xs. This topology, which is not found in other regions, suggests that this

292 stratum evolved in the common ancestor of these two species and that neither species has experienced sex  
293 chromosome turnover since (compare to Fig. 5A). In Regions 2 and 3, most windows exhibit a topology  
294 in which the blackspotted Xs and Ys are sister to one another, as are the Japan Sea Xs and Ys. This  
295 topology suggests the SDR expanded into these regions independently in the two species after they  
296 diverged (compare to Fig. 5B). Region 4 lies in the blackspotted SDR, while it is in the Japan Sea PAR.  
297 As a result, the blackspotted Xs and Ys form clades that are sister to one another, while the Japan Sea Xs  
298 and Ys are intermingled (since they continue to recombine). Finally, the region from 0 to 400 Kb features  
299 clades separating the species, but no differences between the Xs and Ys within species, consistent with it  
300 being a PAR in both species. Few windows on Chr19 show topologies consistent with an X-to-Y  
301 chromosome turnover, and most of those that do fall within regions that also feature several windows  
302 with biologically implausible topologies. Thus, these patterns likely reflect genotyping and phasing errors  
303 resulting from degeneration of the Y chromosomes in one or both species.

304 Chr 12 is sex linked in blackspotted sticklebacks as well as the distantly related ninespine  
305 stickleback, but not in the congeneric Japan Sea or threespine sticklebacks. Gene trees across the SDR of  
306 Chr 12 in the blackspotted stickleback confirm that its neo-X and neo-Y are closely related to one  
307 another, and that its neo-Y is young since its sequences are embedded with the neo-X sequences (Supp.  
308 Fig. 5). Thus, Chr 12 has independently evolved to be a sex chromosome in the blackspotted and  
309 ninespine stickleback.

310

## 311 **Discussion**

312 Many studies have analyzed variation in the mode and tempo of sex chromosome evolution, but most  
313 have compared species that share ancient sex chromosomes (e.g., Hughes et al. 2005; Goto et al. 2009;  
314 Zhou et al. 2014; Xu et al. 2019a; Xu et al. 2019b) or that have non-homologous sex chromosomes (e.g.,  
315 Vicoso et al. 2013; Hough et al. 2014; Papadopulos et al. 2015; Crowson et al. 2017; Jeffries et al. 2018).  
316 Clades in which several species possess sex chromosome pairs that descend from a single recent ancestor  
317 offer unique insight into the predictability of this process. *Gasterosteus* sticklebacks present an excellent  
318 opportunity to quantify variation in the tempo of sex chromosome evolution, as we have established that  
319 the Y chromosomes of all three species are homologous. Using phased X and Y chromosomes, we  
320 obtained the first genomic characterization of the blackspotted stickleback sex chromosomes. This allows  
321 us to compare and contrast their structure and evolutionary history to that of the same pair of sex  
322 chromosomes in threespine and Japan Sea sticklebacks (hereafter called the “threespine clade”) which  
323 have been well-studied (Ross and Peichel 2008; Leder et al. 2010; Natri et al. 2013; Roesti et al. 2013;

324 Yoshida et al. 2014; Schultheiß et al. 2015; White et al. 2015; Yoshida et al. 2017; Dagilis 2019; Peichel  
325 et al. *in press*). We found that the blackspotted stickleback has experienced more extensive suppression of  
326 recombination, sex chromosome differentiation, and Y degeneration than the threespine or Japan Sea  
327 sticklebacks experienced over the same time scales despite a common origin.

328

### 329 Contrasting patterns in other sticklebacks

330 We observed striking differences between the sex chromosomes of the blackspotted and the threespine  
331 clade. Stratum 1 in the threespine clade, which is the oldest in that group (Roesti et al. 2013; Dagilis  
332 2019; Peichel et al. *in press*), is also present in the blackspotted sex chromosomes (Region 1) and evolved  
333 in their shared ancestor. Patterns of divergence at synonymous sites suggests that this shared stratum  
334 formed around the speciation event between blackspotted stickleback and the threespine clade (14 million  
335 years ago). In contrast, Peichel et al. (*in press*) estimated that the oldest stratum of the threespine  
336 stickleback sex chromosomes formed closer to 21.9 million years ago. The latter estimate is probably  
337 more accurate, as it was based on a fully sequenced Y chromosome assembly. In contrast, our method  
338 likely underestimates  $d_s$  in the highly degenerate regions of the blackspotted Y due to genotyping errors.  
339 When a locus is missing from the Y, genotyping algorithms erroneously impute maternal threespine X  
340 alleles onto the phased blackspotted Y sequences. These errors bias our divergence time estimate  
341 downwards towards the time when the threespine and blackspotted X chromosomes diverged. We applied  
342 filters to remove most hemizygous errors from our sequences, but filtering also decreases estimates of  
343 pairwise diversity. Taken together, we conclude that the Y has extensively degenerated across this stratum  
344 in all species and that it has not recombined for approximately 21.9 million years, which is before the  
345 ancestors of the blackspotted and threespine sticklebacks diverged 14 million years ago (Fig. 7) (Dagilis  
346 2019; Varadharajan et al. 2019; Peichel et al. *in press*).

347         Following the divergence of the blackspotted and threespine clade, the SDR independently  
348 expanded across most of the remainder of Chr 19 (Fig. 7). In the threespine clade, this occurred by the  
349 fixation of two inversions that formed Strata 2 and 3 less than 5.9 and 4.7 million years ago, respectively,  
350 or 8.9 and 9.6 million years after the split with the blackspotted stickleback (Ross and Peichel 2008;  
351 Peichel et al. *in press*). In the blackspotted stickleback, the SDR expanded much more rapidly along Chr  
352 19, with recombination suppressed between 10.5 and 14.1 million years ago, i.e., within 4 million years of  
353 the species split. As a result, the blackspotted Y is much more strongly degenerated than the threespine Y  
354 across much of the SDR. The boundaries of the SDR also differ, as the blackspotted PAR is much smaller  
355 (< 500 Kb) than the PAR in the threespine clade (2.5 Mb). Thus, Region 4 recombines in Japan Sea

356 stickleback, but not blackspotted stickleback, further supporting that it evolved after the split with the  
357 threespine clade.

358 We identified three regions (Regions 2, 3, and 4) on the ancestral sex chromosome (Chr 19) of  
359 blackspotted sticklebacks that may represent distinct strata which ceased recombining at different times  
360 after the species split. They exhibit significantly different average values of  $d_s$ , as expected of strata.  
361 However, extensive Y degeneration and resulting hemizyosity on Chr 19 in the blackspotted stickleback  
362 cause estimates of  $d_s$  to be unreliable. Also as expected of strata, these regions differ in the ratio of male  
363 vs. female read depth (Fig. 2). However, they also show clear differences in read depth in females, even  
364 though Y degeneration is expected only to reduce read depth in males (Fig. 2C). Region 3 contains the  
365 centromere (Sardell et al. 2018), which likely results in reduced read depth in both sexes. Region 4 also  
366 has much lower read depth in both the X and Y relative to the center of the chromosome. Reduced read  
367 depth towards the ends of Chr 19 is likewise present in Japan Sea sticklebacks (Dagilis 2019), and may be  
368 a sequencing artifact. Peichel et al. (*in press*) noted that the threespine stickleback PAR contains an  
369 abundance of transposable elements. If these elements evolve rapidly, sequences from closely related  
370 species may fail to map to this region of the threespine X reference. Unfortunately, previous studies of  
371 sex chromosomes in other species have relied solely on the read-depth ratio in males and females without  
372 presenting data from the sexes separately, so we cannot say how general this pattern is. Based on these  
373 findings, we suggest researchers not rely heavily on male-to-female read-depth ratios or  $d_s$  for defining  
374 strata when the differences between regions are small. Indeed, the distinction between Regions 1 and 2  
375 cannot be detected using read depth ratio (Fig. 2) or  $F_{ST}$  (Fig. 3). The difference in  $d_s$  between them is  
376 statistically significant, but in the opposite direction of what is expected based on the known age of the  
377 regions relative to the species split. Instead, differences in gene tree topologies are the defining features of  
378 these strata (Fig. 6).

379 Population genetics statistics for the sex chromosomes differ between species as well. On Chr 19  
380 of Japan Sea stickleback, the Y has lower molecular diversity than the X, while diversity is similar on the  
381 X and Y in the blackspotted stickleback. This difference is driven primarily by diversity on the X, which  
382 is much lower in blackspotted stickleback than Japan Sea stickleback (based on a similar pedigree-based  
383 study by Dagilis (2019)). This difference in diversity on the X may reflect differences in demography.  
384 The Japan Sea stickleback has undergone a major recent population expansion (Ravinet et al. 2018),  
385 while the blackspotted stickleback population appears to have recently contracted based on Tajima's  $D$   
386 for autosomal loci. Tajima's  $D$  for the Y is strongly negative in both species, as expected since both Ys  
387 experienced a bottleneck and then a population expansion following the fusions that created their neo-Ys.

388           The ancestral Y has recently fused with an autosome in both the blackspotted and Japan Sea  
389 sticklebacks, but the identity of the autosome differs: Chr 12 is the neo-sex chromosome in the former,  
390 while Chr 9 is in the latter (Ross et al. 2009). Both these fusions occurred on the same end of Chr 19  
391 distal to the PAR. Both are also very recent. We estimate that they occurred less than 1.4 million years  
392 ago in the blackspotted stickleback and less than 1.2 million years ago in the Japan Sea stickleback  
393 (Dagilis 2019) (Fig. 7). As a result, neither of these two neo-sex chromosome shows signals of extensive  
394 degeneration (see Kitano et al. 2009; Natri et al. 2013; Yoshida et al. 2014; Yoshida et al. 2017; Dagilis  
395 2019). They do, however, differ greatly in the size of their SDRs. The nonrecombining region comprises  
396 77% of the neo-sex chromosome in blackspotted sticklebacks but only 34% in the Japan Sea stickleback,  
397 even though the lengths of the fused chromosomes are nearly identical. Finally, in both species the neo-Y  
398 chromosomes have much lower molecular diversity than the neo-X and negative Tajima's  $D$  (Dagilis  
399 2019). These patterns may result from selective sweeps on the neo-Y associated with establishment of the  
400 fusion.

401           Why the blackspotted Y has much a much larger SDR and a much more highly degraded Y than  
402 the threespine clade is unknown. On one level, these differences likely reflect the ages of the non-  
403 recombining regions: it took more than twice as long after the species split for the inversion that formed  
404 Stratum 2 to fix in the threespine clade than it did for the SDR to expand across nearly all of Chr 19 in  
405 blackspotted stickleback. These differences may have arisen solely by chance.

406           Several factors are thought to also foster rapid rates of chromosome degeneration. These include  
407 higher mutation rates, shorter generation times, smaller population sizes, and increased reproductive skew  
408 among males (Graves 2006). Nothing is known about variation in mutation rates in sticklebacks, and all  
409 *Gasterosteus* species have similar generation times. The blackspotted stickleback has a much smaller  
410 global range than the threespine stickleback (Wootton 1976) and much lower molecular diversity on  
411 autosomes, which suggests it has a much smaller effective population size (based on comparisons with  
412 Hohenlohe et al. 2010). These differences may have made it easier for slightly deleterious inversions to  
413 drift to fixation on the blackspotted stickleback Y. Another possibility is that sexually antagonistic  
414 selection (SAS), which occurs when an allele is beneficial to one sex but harmful to the other, is stronger  
415 in blackspotted sticklebacks. Theory shows that SAS favors suppressed recombination between the X and  
416 Y and sex chromosome-autosome fusions (Charlesworth and Charlesworth 1980; Rice 1987;  
417 Charlesworth 2017). There is no *a priori* reason, however, to suspect that the degree of SAS should vary  
418 greatly between *Gasterosteus* species.

419           Another possibility is that differences in recombination landscapes between species could favor  
420 differential rates of SDR expansion. The strength of selection for inversions on sex chromosomes is

421 directly proportional to the recombination rate between the sex determining gene and a locus subject to  
422 SAS (Rice 1987). The threespine clade of sticklebacks exhibits strongly sexual dimorphic recombination  
423 (*i.e.* heterochiasmy), with crossovers clustering near the telomeres of all chromosomes in males (Sardell  
424 et al. 2018). This pattern results in relatively low recombination between the X and Y throughout most of  
425 the chromosome. Low recombination, in turn, decreases the strength of selection for modifiers such as  
426 inversions that further reduce recombination between a site subject to SAS and the sex determining gene  
427 (Sardell and Kirkpatrick 2020). Strength of selection for SDR expansion might be stronger in  
428 blackspotted stickleback if the male recombination landscape is more uniform across chromosomes.  
429 Under this hypothesis, species differences in recombination landscapes would have evolved quickly since  
430 we estimate that the SDR began expanding in blackspotted stickleback very shortly after the species split.  
431 Although we do not currently have estimates of genome-wide recombination rates in blackspotted  
432 stickleback, this scenario is plausible as differences in fine-scale recombination landscapes rapidly  
433 evolved in very recently diverged populations of threespine stickleback (Shanfelter et al. 2019).

434         The conservation of Chr 19 as a sex chromosome for at least 14 million years, and likely 21.9  
435 million years in *Gasterosteus* (Peichel et al. *in press*), contrasts sharply with the high rates of sex  
436 chromosome turnover in the rest of the stickleback family. Stickleback species in the genus *Pungitius*, for  
437 example, vary both in which chromosome is sex-linked and in which sex is heterogametic (Ross and  
438 Peichel 2008; Dixon et al. 2018; Natri et al. 2019). Why sex chromosome turnover rates vary so much  
439 within sticklebacks is a mystery. The “hot-potato” model of sex chromosome evolution posits that  
440 degeneration of the Y favors the invasion of a new Y chromosome in species without dosage  
441 compensation (Blaser et al. 2013). This hypothesis suggests that sex chromosome turnovers in  
442 *Gasterosteus* sticklebacks should be common since these species have degenerate Y chromosomes and  
443 incomplete dosage compensation (White et al. 2015). Perhaps some sort of constraint inhibits the origin  
444 of a new pair of sex chromosomes in *Gasterosteus* but not in other sticklebacks. Alternatively, SAS  
445 acting on Chr 19 may favor maintenance of the ancestral sex chromosome (van Doorn and Kirkpatrick  
446 2007).

447         It is also unclear what evolutionary force drove the origin of the neo-sex chromosome of the  
448 blackspotted stickleback. SAS may have driven the fusion of Chr 12 in blackspotted stickleback, as data  
449 suggests may be the case in Japan Sea stickleback (Dagilis 2019). The targets of selection must differ,  
450 however, since the fusions involve different autosomes. Another possibility is the “fragile-Y” hypothesis  
451 (Blackmon and Demuth 2015). This theory posits that small PARs increase rates of aneuploidy in sperm  
452 because they provide little room for chiasma to form and ensure proper meiotic segregation. Fusions that  
453 expand the PAR may therefore be favored. Consistent with this idea, the PAR on Chr 19 is very small

454 (0.4 Mb), comprising less than 2% of the total length of the chromosome. Moreover, its small size likely  
455 predates the fusion with Chr 12, a precondition of the fragile-Y hypothesis, as all regions of the Chr 19  
456 SDR are much more degenerated than the Chr 12 SDR.

457

#### 458 Comparisons with other taxa

459 A handful of previous studies have also reported differences between closely related species in the extent  
460 of recombination suppression, sex chromosome differentiation, and Y (or W) degeneration. The best  
461 examples come from birds. Although all birds share an homologous W chromosome, the number of strata  
462 and size of the PAR varies widely between species (Zhou et al. 2014; Xu et al. 2019a; Xu et al. 2019b).  
463 Homologous strata also show extensive heterogeneity in degeneration across bird species (Zhou et al.  
464 2014). Likewise, Hughes et al. (2005) observed much higher rates of degeneration on a part of the  
465 chimpanzee Y chromosome compared to its homologous region on the human Y. Both the avian and  
466 mammalian sex chromosomes are more than 140 million years old (Cortez et al. 2014). Our findings  
467 show that evolutionary dynamics of sex chromosomes can also differ dramatically between closely  
468 related species with much younger sex chromosomes (less than 22 million years old, based on Peichel et  
469 al. (*in press*)). Perhaps the most similar previous finding shows that heteromorphic and homomorphic sex  
470 chromosomes are homologous in the flowering plant genus *Spinacia* (Fujito et al. 2015). However, that  
471 study relied on cytogenetics, flow cytometry, and presence or absence of a small number of sex-linked  
472 markers to demonstrate differences in sex chromosome structure, and did not investigate the genomics of  
473 sex chromosome evolution. As such, they could only detect broad-scale variation in X-Y differentiation  
474 or Y degeneration across species.

475 Darolti et al. (2019) reported even more extreme variation in sex chromosome degeneration  
476 between closely related fishes. They showed that the Y chromosome of *Poecilia picta* is highly  
477 degenerate, even though the same pair of X and Y chromosomes are nearly undifferentiated in its  
478 congeners, *P. reticulata* and *P. wingei*. Darolti et al. (2019) did not explicitly establish that the Y  
479 chromosomes are homologous in all three species, however. Specifically, they did not rule out the  
480 possibility that a sex chromosome turnover occurred in the shared ancestor of *P. reticulata* and *P. wingei*  
481 (*i.e.*, a new Y originated from an X chromosome after the ancestor of those two species diverged from *P.*  
482 *picta*). In this hypothesis, the sex chromosomes in the former two species are undifferentiated not because  
483 of slower rates of sex chromosome evolution, but because their Y chromosomes are much younger and/or  
484 continue to recombine. Darolti et al. (2019) found that surprisingly few *k*-mers are shared by all three  
485 species. They ascribed this result to extensive Y degeneration in *P. picta*. Yet we find shared sequences in



486 the oldest stratum of the blackspotted and Japan Sea sticklebacks despite extensive Y degeneration in  
487 both species. Thus, their results are equally consistent with the turnover hypothesis, and this uncertainty  
488 precludes comparisons of rates of sex chromosome evolution. Unfortunately, the extreme degeneration of  
489 the *P. picta* Y chromosome imposes challenges for reconstructing the evolutionary history of these  
490 species' sex chromosomes due to the difficulty in confidently assigning sequences to the Y.

491 For this study, we developed a novel method based on chromosome duplications that explicitly  
492 tests for the homology of sex chromosomes between species. This approach and a complementary method  
493 using gene trees are useful for comparing rates of sex chromosome differentiation and degeneration  
494 across closely related species. They also can be used to identify cryptic sex chromosome turnovers that  
495 involve the same linkage group. *Fugu* pufferfish and house flies (*Musca domestica*) are the only known  
496 cases of sex chromosome turnover events in which a new Y originated from an old X chromosome  
497 (Meisel et al. 2017; Ieda et al. 2018). Such turnovers may be much more common than currently believed,  
498 however, as it is much easier to identify turnovers that involve a transition between different pairs of  
499 chromosomes or between XY and ZW sex determination. We strongly recommend that all comparative  
500 studies of sex chromosome evolution explicitly test for cryptic turnover and Y chromosome homology.  
501 Not doing so can lead to underestimates of sex chromosome turnover and inappropriate comparisons  
502 between non-homologous Y chromosomes.

### 503 Conclusions

504 Extensive variation in sex determination among stickleback fishes make them an ideal model system for  
505 studying sex chromosome evolution. Previous studies have documented several sex chromosome turnover  
506 events in this family (Ross et al. 2009; Dixon et al. 2018; Natri et al. 2019). The results of our study show  
507 that the situation in sticklebacks is even more complex, as the sex chromosomes of *Gasterosteus*  
508 sticklebacks differ substantially despite evolving from a common ancestral pair of XY chromosomes. We  
509 expect that future studies will show that similar variation within shared sex chromosome systems is  
510 common, and provide a novel framework for establishing sex chromosome homology.

511

512

## 513 **Materials and Methods**

### 514 Sampling and Sequencing

515 All procedures involving live fish were approved by the Veterinary Service of the Department of  
516 Agriculture and Nature of the Canton of Bern (VTHa# BE4/16 and BE17/17) and the St. Mary's  
517 University Animal Care Committee (17-18A2). During June and July 2017, we collected threespine  
518 stickleback (*Gasterosteus aculeatus*) and blackspotted stickleback (*Gasterosteus wheatlandi*) from Canal  
519 Lake, Nova Scotia, Canada (44.498654, -63.902952), threespine stickleback from Humber Arm,  
520 Newfoundland, Canada (49.009842, -58.132643), and blackspotted stickleback (*Gasterosteus wheatlandi*)  
521 from York Harbour, Newfoundland, Canada (49.058555, -58.373138) under Department of Fisheries and  
522 Oceans permits for the Maritime Region (Licence 343930; FIN 700019217) and Newfoundland  
523 (Experimental Licence NL-4111-17). We made fifteen independent crosses by *in vitro* fertilization of the  
524 eggs of a single threespine stickleback female with sperm from a unique blackspotted stickleback male.  
525 Five crosses were made using five different blackspotted males and a single threespine female collected  
526 from Newfoundland, and ten crosses were made using ten different blackspotted males and three  
527 threespine females collected from Nova Scotia. Interspecific crosses were used because they allow us to  
528 better phase the paternal and maternal X chromosomes in daughters. These interspecies F1 hybrid  
529 embryos start to develop but then arrest and never hatch (Hendry et al. 2009; C. Peichel, pers. obs.), so  
530 crosses were raised until developmental arrest and then placed into 95% ethanol. DNA was extracted  
531 from fin clips of the cross parents and from individual embryos using phenol-chloroform extraction,  
532 followed by ethanol precipitation. The sex of the embryos was determined using microsatellite markers  
533 on chromosomes 12 (*Stn327*, *Pun2*) and 19 (*Stn284*, *Cyp19b*), that were previously shown to be sex-  
534 linked in blackspotted stickleback (Ross et al. 2009). For each of the fifteen crosses, we sequenced the  
535 mother, the father, one son, and one daughter. DNA from each of these individuals was used to construct  
536 Illumina TruSeq DNA nano libraries, which were sequenced for 300 cycles (2 x 150 bp paired-end reads)  
537 in an S2 flow cell on an Illumina NovaSeq 6000. Library construction, sequencing, barcode trimming,  
538 and initial quality control was performed by the University of Bern Next Generation Sequencing  
539 Platform.

540

### 541 Sequence assembly & SNP calling

542 We used *bwa mem* v.7.16 (Li and Durbin 2010) to map all raw reads to the most recent masked assembly  
543 of the threespine stickleback reference genome (Glazer et al. 2015). We sorted and removed all reads with  
544 low mapping quality (< 20) using *SAMtools* v.1.6 (Li et al. 2009). SNP calling was performed using the

545 *samtools mpileup* and *bcftools call* functions in *SAMtools* v.1.6 (Li et al. 2009). We used *VCFtools* v.1.15  
546 (Danecek et al. 2011) to filter the VCF file, retaining only biallelic SNPs with minimum quality scores of  
547 999. Genotypes where the genotype quality was less than 20 were treated as missing data. Finally, we  
548 removed all SNPs where more than 3 sons or 3 daughters were missing data.

549 We did not include the recently-published assembly of the threespine stickleback Y (Peichel et al.  
550 *in press*) in the reference genome used for mapping for several reasons. First, a main aim of this project  
551 was to identify homologous regions on the X and Y chromosomes that we could use to construct gene  
552 trees. This process would have been much more difficult if we had mapped reads to separate X and Y  
553 reference scaffolds. Second, much of the threespine stickleback Y has degenerated, especially in Stratum  
554 1. We also expect that some genes that were lost on the threespine stickleback Y have been retained on  
555 the blackspotted stickleback Y. Thus, use of separate X and Y reference scaffolds would result in  
556 chimeric mapping of the blackspotted stickleback Y reads, with some aligning to the X reference and  
557 others aligning to the Y reference. This situation would greatly complicate phasing and our ability to  
558 directly compare the X and Y sequences.

559

## 560 Phasing

561 We used a custom R script to phase the paternal and maternal gametes by transmission for parent-  
562 offspring trios, as described in Sardell et al. (2018) and Dagilis (2019). Briefly, for every heterozygous  
563 SNP in the offspring, we used parental genotypes to determine which allele was inherited from the father  
564 and which allele was inherited from the mother. Paternally inherited alleles in sons and daughters were  
565 transmitted in sperm containing an Y or X chromosome, respectively. This provided us with sequences of  
566 15 blackspotted X chromosomes and 15 blackspotted Y chromosomes independently sampled from the  
567 wild. SNPs where the offspring and both parents were heterozygous cannot be unambiguously phased, so  
568 we conservatively treated them as missing data. Likewise, we removed any site where the offspring's  
569 genotype included an allele that was not present in either parent. We then used a script provided by Dixon  
570 et al. (2018) to convert the genotypes into a haploid VCF file with a column for each gamete. We used  
571 custom phasing scripts rather than phase-by-transmission scripts from standard bioinformatic packages  
572 (e.g., GATK), because the latter are not specifically designed to account for transmission patterns in sex  
573 chromosomes and often produced clearly erroneous phasing results when applied to our data. Our  
574 approach is more conservative in assigning phased haplotypes to the X and Y.

575

576 Identification of SDR

577 We used *VCFtools --geno-depth* v.1.15 (Danecek et al. 2011) to extract the read depth for each son or  
578 daughter at each SNP. We then used a custom R script to calculate the ratio of the mean read depths in  
579 sons to the mean read depths in daughters (i.e., read depth ratio) in 10 Kb windows. All custom scripts  
580 referred to in this section are publicly available, as outlined in the Data Accessibility section.

581 Before calculating population genetic statistics, we further filtered our genotypes using *VCFtools*  
582 v.1.15 to remove sites with excessive read depth, which likely represent duplications with multiple  
583 paralogs. We used 52 as the maximum mean read depth threshold, which represented 1.5 times the mean  
584 read depth on autosomes. We also removed sites where the mean read depth was below 26 (i.e., 0.75  
585 times the mean autosomal read depth) to minimize genotyping errors at hemizygous sites. Finally, we  
586 used *VCFtools* v.1.15 to calculate weighted  $F_{ST}$  between the phased X and Y chromosomes, as well as  
587 genomic diversity ( $\pi$ ) and Tajima's  $D$  for the X and Y separately.

588 We calculated genomic divergence using a pipeline and scripts developed by Dixon et al. (2018).  
589 We first used FastaAlternateReferenceMaker from the Genome Analysis Toolkit (DePristo et al. 2011) to  
590 generate consensus sequences for the blackspotted X, blackspotted Y, and threespine X sequences from  
591 our pedigrees. We then used a custom script to generate individual sequences for each gene annotated in  
592 the .gff file for the most recent assembly of the threespine stickleback reference genome (Glazer et al.  
593 2015). Finally, we used PAML v.4.9 (Yang 2007) to calculate  $d_S$ ,  $d_N$ , and  $d_N/d_S$  for each gene by  
594 comparing the blackspotted stickleback X and Y. We also calculated  $d_S$  by comparing the blackspotted  
595 stickleback X to the threespine stickleback X. We estimated the age of each region by taking the ratio of  
596 the mean synonymous site divergence between the blackspotted stickleback X and Y to the mean  
597 synonymous site divergence between the blackspotted and threespine stickleback Xs. We then multiplied  
598 the result by 14.3 million years, i.e., the estimated age of the most recent common ancestor between  
599 blackspotted and threespine stickleback (Varadharajan et al. 2019). We removed genes with fewer than 20  
600 total SNPs when calculating  $d_N/d_S$  on Chr 19 and fewer than 15 total SNPs on Chr 12, to eliminate  
601 division by zero errors. Lowering this threshold to 10 total SNPs did not affect the results significantly.

602 Gene trees within an SDR should be what we term "Y (or X) monophyletic" (Dixon et al. 2018;  
603 Dagilis 2019). This condition holds if all of the Xs or Ys form a monophyletic clade with respect to the  
604 other sex chromosome. We used a custom R script to convert the haploid VCF files for each chromosome  
605 into fasta files comprising the SNP genotypes for each individual. We then used RAxML v.8.2.12  
606 (Stamatakis 2014), employing the GTRGAMMA model and a rapid bootstrap analysis (*-fa*) over 1000  
607 bootstraps, to generate gene trees in 100 Kb windows across Chromosomes 19 and 12. We calculated the

608 fraction of Ys (or Xs) falling within the largest monophyletic clade of Ys (or Xs) using a custom R script  
609 that employs the R packages *ape* (Popescu et al. 2012) and *phytools* (Revell 2012). Gene trees are  
610 considered to be Y monophyletic when all Y sequences fall within a single monophyletic clade.

611

#### 612 Identification of homologous autosomal-Y duplications

613 Our first approach for testing whether the sex chromosomes are homologous was to test whether  
614 chromosomal rearrangements involving the Y are shared between species. Bissegger et al. (2019) noted  
615 that, in threespine stickleback, many loci that map to autosomes in the Glazer et al. (2015) reference  
616 genome exhibit extreme differences in allele frequency between males and females. The observed allele  
617 frequency differences are biologically implausible as they require extreme mortality in the population  
618 (since autosomal allele frequencies will be approximately equal between males and females at  
619 conception). Bissegger et al. (2019) instead suggested that these regions represent loci that have  
620 duplicated from the autosome onto the Y chromosome. Alternatively, they may represent regions on the  
621 divergent Y chromosome that have duplicated onto an autosome and do not have a similar paralog on the  
622 X. The important result is that Y-linked reads erroneously map to an autosomal region of the reference  
623 genome because the reference was obtained from a female and the X does not contain an homologous  
624 sequence.

625 We remapped the blackspotted stickleback sequences from this study to the unmasked assembly  
626 of the Glazer et al. (2015) threespine stickleback reference genome (since repeat-rich regions may be  
627 more likely to duplicate). We again applied the same filtering criteria as those used for initial  
628 identification of the SDR. We removed any SNPs where we had high quality genotype data from fewer  
629 than 8 sons or fewer than 8 daughters. We did the same for a set of phased Japan Sea X and Y sequences  
630 generated by Dagilis (2019).

631 We tested for homology between the blackspotted and Japan Sea stickleback Y chromosomes by  
632 identifying autosomal regions that show extreme differences in allele frequencies between males and  
633 females in both species. We first used *VCFtools* v.1.15 to calculate weighted  $F_{ST}$  between the phased X  
634 and Y sequences separately for each species in 10 Kb non-overlapping windows across all autosomes. We  
635 then used custom R scripts to identify windows in which mean  $F_{ST}$  falls within the top 2 percent of  
636 windows in both species. Within each of these shared outlier windows, we calculated  $F_{ST}$  between the X  
637 and Y sequences at each SNP, and identified all SNPs with  $F_{ST} > 0.25$  in both species. We further filtered  
638 the set of shared high- $F_{ST}$  SNPs to include only those sites in which an allele is restricted to males in both  
639 species (as expected of mutations occurring on the Y paralog). Windows that contain multiple SNPs

640 satisfying these criteria are interpreted as conclusive evidence that the Y chromosomes in blackspotted  
641 and Japan Sea sticklebacks are homologous. The alternative hypothesis of independent duplications  
642 would require not only that the same autosomal region was independently duplicated onto the Y multiple  
643 times, but also that it then independently accrued the same point mutations at multiple loci in less than 14  
644 million years.

645 To confirm that the putative Y duplications are also present in threespine sticklebacks, we used  
646 *blastn* v.2.8.1 to search for similar sequences in the threespine stickleback Y reference (Peichel et al. *in*  
647 *press*) as well as the Glazer et al. (2015) threespine stickleback reference genome, which was sequenced  
648 from a female. We also identified significant overlap between autosomal regions with high  $F_{ST}$  from our  
649 study and the putative autosome-to-Y duplications identified by Bissegger et al. (2019) for threespine  
650 stickleback. We do not present the results in this manuscript, however, as the bioinformatic and analytic  
651 pipelines used in their study, including filtering criteria and measures of genetic differentiation, were  
652 quite different from ours, increasing the likelihood of type II errors.

653

#### 654 Tree-based method for identifying sex chromosome homology

655 Our second approach for testing whether the sex chromosomes are homologous in all three *Gasterosteus*  
656 species utilizes gene trees. We included phased blackspotted stickleback X and Y sequences from four  
657 crosses in this study. Each cross used a different threespine stickleback mother, and we included the  
658 phased maternal X sequences in our analysis. Four phased X and four phased Y sequences from Japan  
659 Sea stickleback fathers, and their eight corresponding phased maternal threespine X sequences, were  
660 obtained from an earlier study that employed the same experimental cross design (Dagilis 2019). SNP-  
661 calling and phasing for the combined data set was undertaken using the methodology described above.  
662 Any sites with mean read depth less than 17 or less than 67 (representing 0.5X and 2X mean read depth  
663 across all SNPs, respectively) were removed from the dataset. In addition, we removed any sites within  
664 the SDR that were heterozygous in the father but where phasing indicated that brothers and sisters  
665 inherited the same paternal allele. Such inheritance patterns cannot occur within an SDR and likely  
666 represent genotyping/phasing errors arising from hemizyosity on the Y. We rooted the trees using a  
667 computationally phased *Pungitius pungitius* genome from Dixon et al. (2018). Gene trees were  
668 constructed in RAxML v.8.2.12 (Stamatakis 2014) using the same parameters described above for testing  
669 XY consistency.

670 One potential problem with this approach is that genotyping errors in highly degenerate strata can  
671 lead to false topologies. For example, a SNP that is hemizygous in sons due to deletions on the Y will be

672 assigned a homozygous genotype that incorrectly attributes the maternal threespine X allele to the  
673 blackspotted or Japan Sea Y. Therefore, we filtered the dataset to only include windows where the  
674 maximum likelihood tree either features four monophyletic clades representing the blackspotted Xs,  
675 blackspotted Ys, Japan Sea Xs, and Japan Sea Ys (as expected of old SDRs) or monophyletic clades for a  
676 species (as expected of PARs or new SDRs).

677 All windows within a non-recombining stratum should share the same topology since they all  
678 descend from the same physical chromosome on which recombination suppression (*e.g.*, by an inversion)  
679 first arose. As described above, false topological inferences can arise from genotyping or phasing errors  
680 in regions of the chromosomes with large deletions on the Y. Therefore, we assume that the most  
681 common topology probably represents the true evolutionary history. Additionally, in our pedigrees,  
682 deletions on the Y are most likely to result in topologies in which one or both species' Ys cluster with the  
683 threespine X sequences, since SNP-calling programs will wrongly impute the maternal threespine X allele  
684 as the blackspotted or Japan Sea Y genotype. Thus, topologies consistent with independent Y evolution  
685 (Fig. 5B) or Y turnover (Fig. 5C) are far more likely to arise via error than topologies consistent with a  
686 single Y origin (Fig. 5A).

687

## 688 **Data Accessibility**

689 Sequencing data generated for this project are archived on the NCBI SRA database and will be released  
690 upon publication. Scripts used for data processing and analysis are available on GitHub  
691 (<https://github.com/JasonSardell/BlackspottedStickleback>). Scripts and intermediate data files are also  
692 archived on Dryad and will be released upon publication.

693

## 694 **Acknowledgments**

695 This work was supported by the National Institutes of Health (grant R01-GM116853 to M.K. and C.L.P.).  
696 We thank Andrius Dagilis for assistance on genomic analysis and comments on the manuscript, and  
697 Groves Dixon for providing data and computer scripts.

698

699

## 700 **Figure captions**

701 **Figure 1:** Phylogeny of several stickleback species (family Gasterosteidae) showing which chromosomes  
702 determine sex. Species in the genus *Gasterosteus* are highlighted in bold. Y-autosome fusions are  
703 indicated by “+”. Question marks denote species where the identity of the sex chromosome pair is  
704 unknown, but is inferred to be different from closely related species. (Figure after Ross et al. (2009) and  
705 Dixon et al. (2018).)

706 **Figure 2:** Read depth statistics for 15 sons and 15 daughters from the pedigrees. (A) Histogram of  
707 male/female read depth ratio for all SNPs on the two pairs of sex chromosomes and the autosomes.  
708 Dashed vertical lines show values expected with Y chromosomes that are highly degenerated (ratio = 0.5)  
709 and non-degenerated (ratio = 1). (B) Plot of mean male/female read depth ratio along Chromosome 19.  
710 Dashed horizontal gray line represents autosomal mean. (C) Plot of mean read depth in sons (blue) and  
711 daughters (green) along Chromosome 19. Dots are averages in 10 Kb windows. Dashed vertical lines  
712 represent boundaries between the PAR (labeled P) and the four regions in the SDR (labeled R1 to R4) that  
713 were identified using methods described in text. Solid horizontal lines show the means for the regions.  
714 Gray dots underneath the plots denote the location of the centromere on the X chromosome in threespine  
715 stickleback.

716 **Figure 3:** Population genetic statistics for 15 X and 15 Y chromosomes in blackspotted stickleback.  
717 Points are averages in 10 Kb windows. Panels A-D represent the ancestral sex chromosome (Chr 19) and  
718 Plots E-H represent the fused neo-sex chromosome (Chr 12). (A,E)  $F_{ST}$  between X and Y chromosomes.  
719 (B, F) Fraction of Y (or X) chromosomes that fall within the largest monophyletic clade of Y (or X)  
720 chromosomes on the gene tree. (C, G) Tajima’s  $D$  across X and Y chromosomes. (D, H) Genetic diversity  
721 ( $\pi$ ) across X and Y chromosomes. Solid lines show the means for the PAR (P) and the four regions (R1 to  
722 R4) on the SDR of Chr 19. Loess best-fit curves show the means for the PAR (P) and SDR (R5) of  
723 Chromosome 12. Horizontal gray lines in panels C, D, G, and H show autosomal means.

724 **Figure 4:** Three 10 Kb windows on autosomes include regions that duplicated onto the Y chromosome  
725 (Chr 19) in the shared ancestor of *Gasterosteus* sticklebacks.  $F_{ST}$  between sons and daughters for alleles  
726 inherited from the father is shown for each SNP. Circles represent SNPs in blackspotted (BS) sticklebacks  
727 and triangles represent SNPs in Japan Sea (JS) sticklebacks. “Homologous” denotes SNPs that have  $F_{ST} >$   
728 0.25 and a male-specific allele in both species, which provides strong evidence for Y chromosome  
729 homology. The window between 17.15 to 17.16 Mb on Chr 8 contains the ortholog to the putative male-  
730 determining gene (*Amhy*) in threespine stickleback (Peichel et al. 2020).



731 **Figure 5:** Different evolutionary histories of sex chromosomes result in different gene tree topologies.  
732 (A) Topology when the Y chromosomes of two species (A and B) are homologous, having originated in  
733 their common ancestor. (B) Topology when the Y chromosomes originated independently in two species.  
734 (C) Topology when the X and Y are retained from the ancestor in Species B, while a new Y was derived  
735 from an X chromosome and replaced the ancestral Y in a turnover event in Species A.

736 **Figure 6:** Gene tree topologies along Chr 19 reveal different evolutionary histories. Each dot represents  
737 the maximum likelihood topology for a 100 Kb window. Representative trees associated with each  
738 topology are shown at right (BS = blackspotted, JS = Japan Sea, TS = threespine). “Other topologies”  
739 indicates topologies that do not correspond to a plausible evolutionary history, and likely result from  
740 genotyping and/or phasing error. Most windows in Region 1 have a topology indicating that the stratum  
741 arose in the shared *Gasterosteus* ancestor. Most windows in Regions 2 and 3 have a topology consistent  
742 with strata that formed independently in blackspotted and in the ancestor of Japan Sea and threespine  
743 sticklebacks. Most windows in Region 4 have a topology consistent with an SDR in blackspotted and a  
744 PAR in the ancestor of Japan Sea and threespine sticklebacks.

745 **Figure 7:** Estimated dates of the major steps in the evolution of sex chromosomes across *Gasterosteus*.  
746 The most recent common ancestor (MRCA) of *Gasterosteus* and all other stickleback species is on the  
747 left. The oldest stratum formed in the ancestor of the genus, and the SDR independently expanded across  
748 the sex chromosomes in blackspotted stickleback (Regions 2-4) and the threespine clade (Strata 2 and 3).  
749 The Y chromosome recently fused with different autosomes in blackspotted and Japan Sea stickleback.  
750 Estimated dates are from Varadharajan et al. (2019), Peichel et al. (*in press*), and Dagilis (2019).

751

## 752 **Supplemental figure captions**

753 **Supp. Fig. S1:** Divergence at synonymous sites ( $d_s$ ) for each gene on Chr 19 (left panels) and Chr 12  
754 (right panels). Top panels:  $d_s$  between blackspotted stickleback (BS) X and Y chromosomes. Bottom  
755 panels:  $d_s$  between blackspotted stickleback (BS) and threespine stickleback (TS) X chromosomes.  
756 Dashed vertical lines represent boundaries between the PARs (labeled P) and the four regions in the SDR  
757 on Chr 19 (labeled R1 to R4) and on Chr 12 (labeled R5) that were identified using methods described in  
758 text. Solid horizontal lines show the means for the regions.

759 **Supp. Fig. S2:** Divergence statistics for individual genes on Chr 19 (left panels) and Chr 12 (right  
760 panels). Top panels: divergence at nonsynonymous sites ( $d_N$ ) between blackspotted stickleback (BS) X  
761 and Y chromosomes. Bottom panels:  $d_N/d_s$  between blackspotted stickleback X and Y chromosomes.  
762 Only genes containing at least 20 SNPs (Chr 19) or 15 SNPs (Chr 12) are included in  $d_N/d_s$  plot to  
763 eliminate division by zero errors. Dashed vertical lines represent boundaries between the PARs (labeled  
764 P) and the regions in the SDR on Chr 19 (labeled R1 to R4) and on Chr 12 (labeled R5) that were  
765 identified using methods described in text. Solid horizontal lines show the means for the regions. The Y  
766 axes are plotted on a log scale.

767 **Supp. Fig. S3:** Read depth statistics for Chr 12 of blackspotted stickleback based on 15 sons and 15  
768 daughters. (A) Plot of mean male/female read depth ratio. Dashed horizontal gray line represents the  
769 autosomal mean. (B) Plot of mean read depth in sons (orange) and daughters (red). Dots show averages in  
770 10 Kb windows. Dashed vertical lines show the boundary between the SDR and the PAR. Solid curves  
771 are Loess best-fit.

772 **Supp. Fig. S4:** Read depth statistics provide evidence for autosome-to-Y duplications in the three regions  
773 of the blackspotted SDR shown in Fig. 4. Each point represents a SNP with  $F_{ST} > 0.25$  and a male-  
774 specific allele in both blackspotted and Japan Sea sticklebacks. Points denote SNPs from the 10 Kb  
775 windows with the shapes shown in the key. (A) Male/female read depth ratio in blackspotted (BS)  
776 sticklebacks (left, purple) and Japan Sea (JS) sticklebacks (right, gray). Solid horizontal gray line  
777 indicates the autosomal mean. Horizontal dashed gray lines indicate intervals of 0.5 times the autosomal  
778 mean, i.e., the expected values for one or more autosome-to-Y duplications. (B) Fraction of reads  
779 possessing male-specific allele in blackspotted (BS) sticklebacks (left, purple) and Japan Sea (JS)  
780 sticklebacks (right, gray). Solid horizontal gray line indicates the value expected for non-duplicated  
781 regions.

782 **Supp. Fig. S5:** Gene tree topologies along Chr 12 demonstrate the recent origin of the SDR. Each dot  
783 represents the maximum-likelihood topology for a 100 Kb window. Representative trees are shown at  
784 right (BS = blackspotted, JS = Japan Sea, TS = threespine). In most windows from the SDR, a  
785 monophyletic clade of blackspotted stickleback neo-Ys is imbedded within the blackspotted neo-Xs.

786

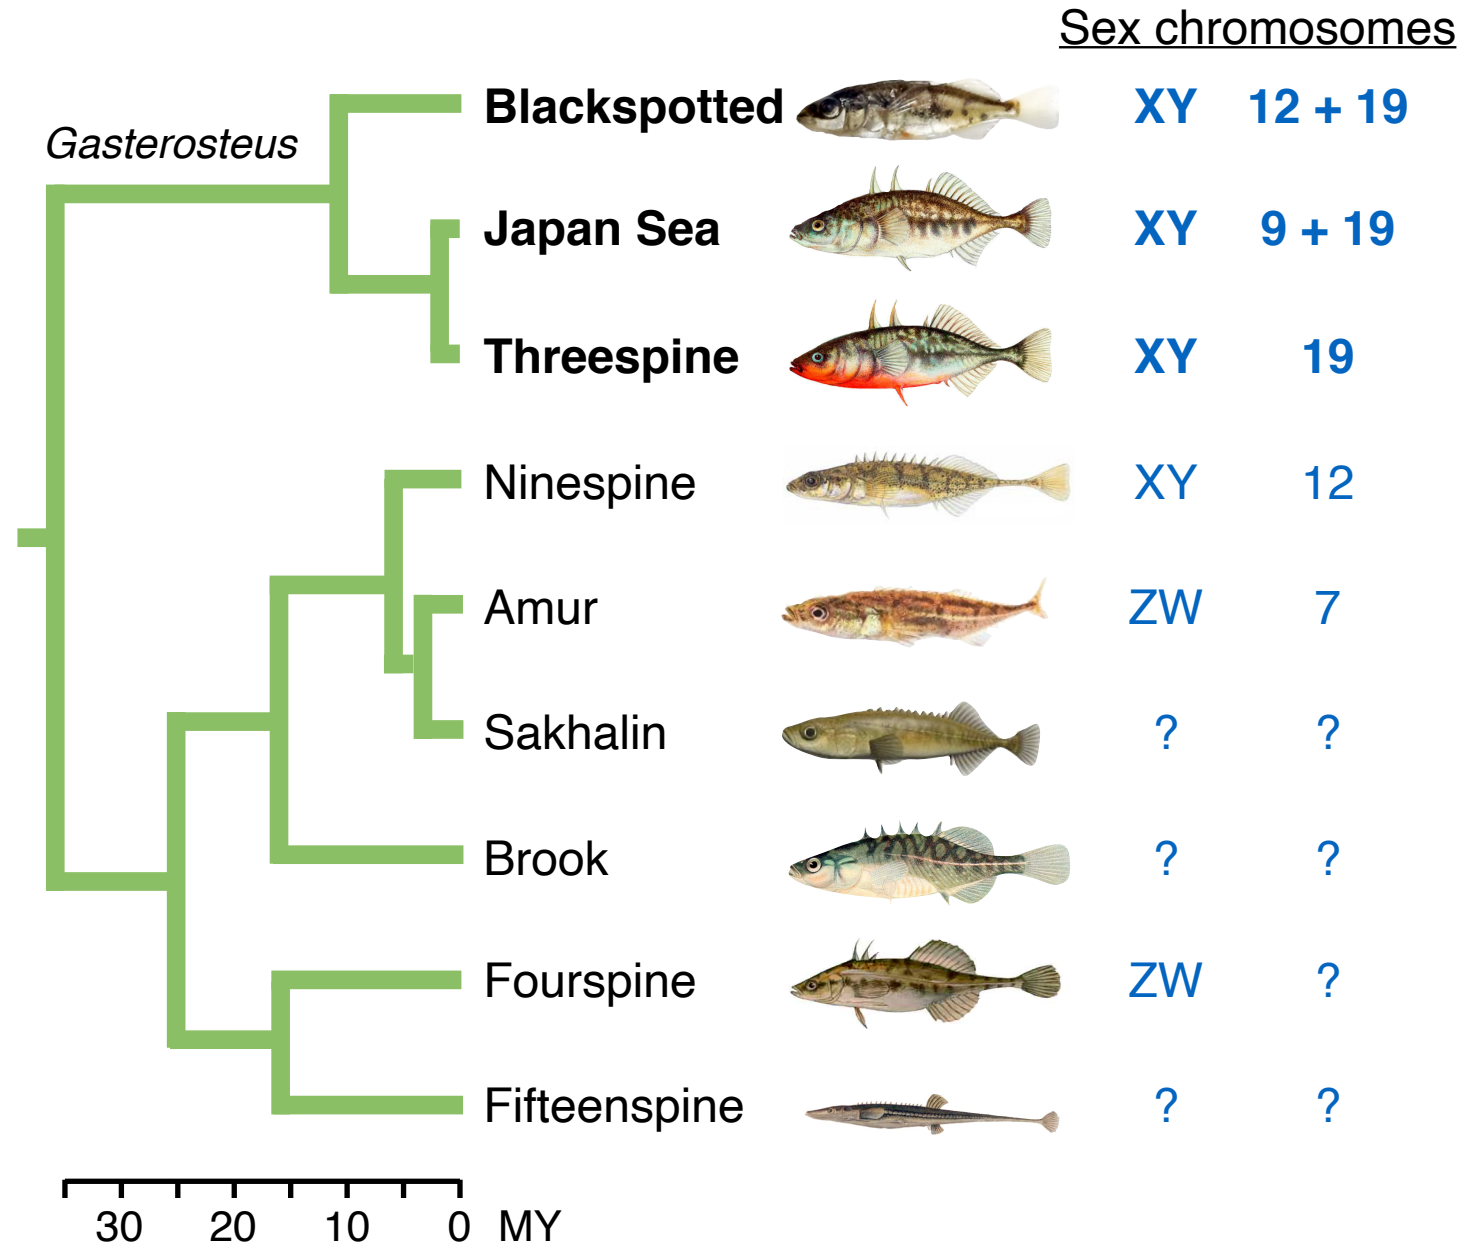

Figure 1

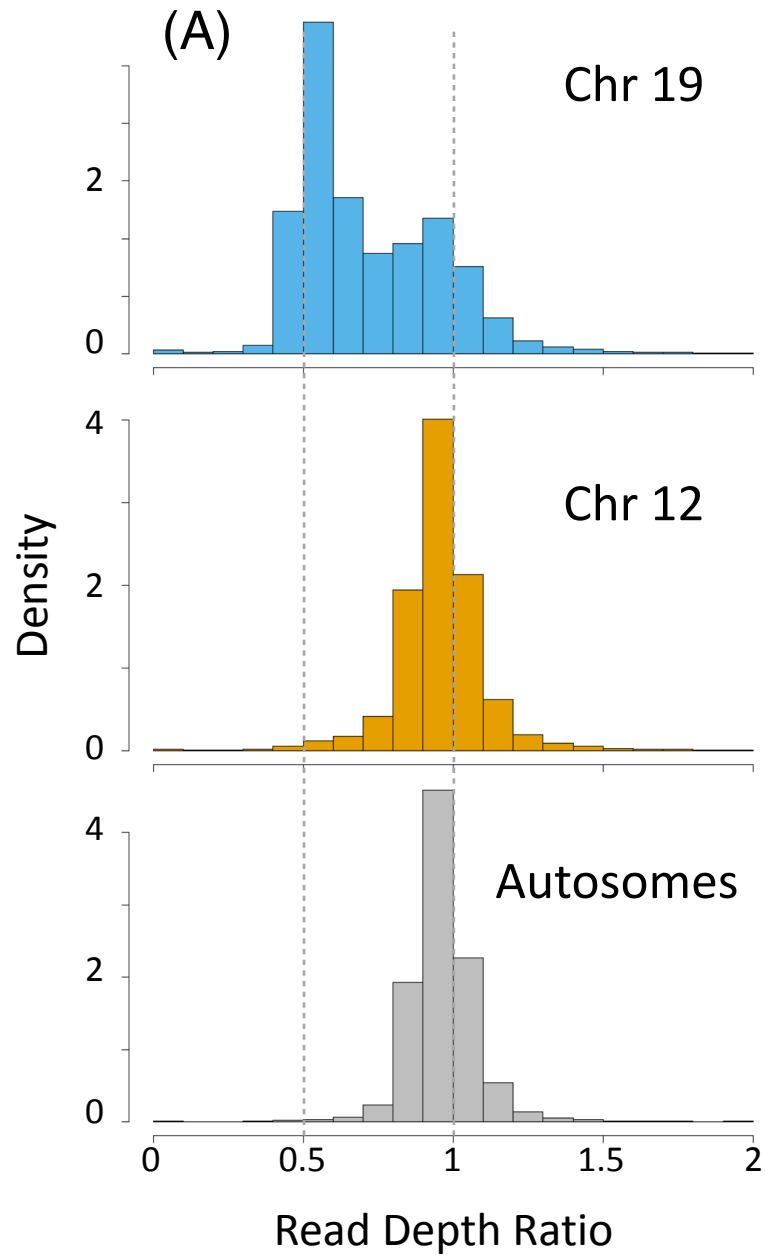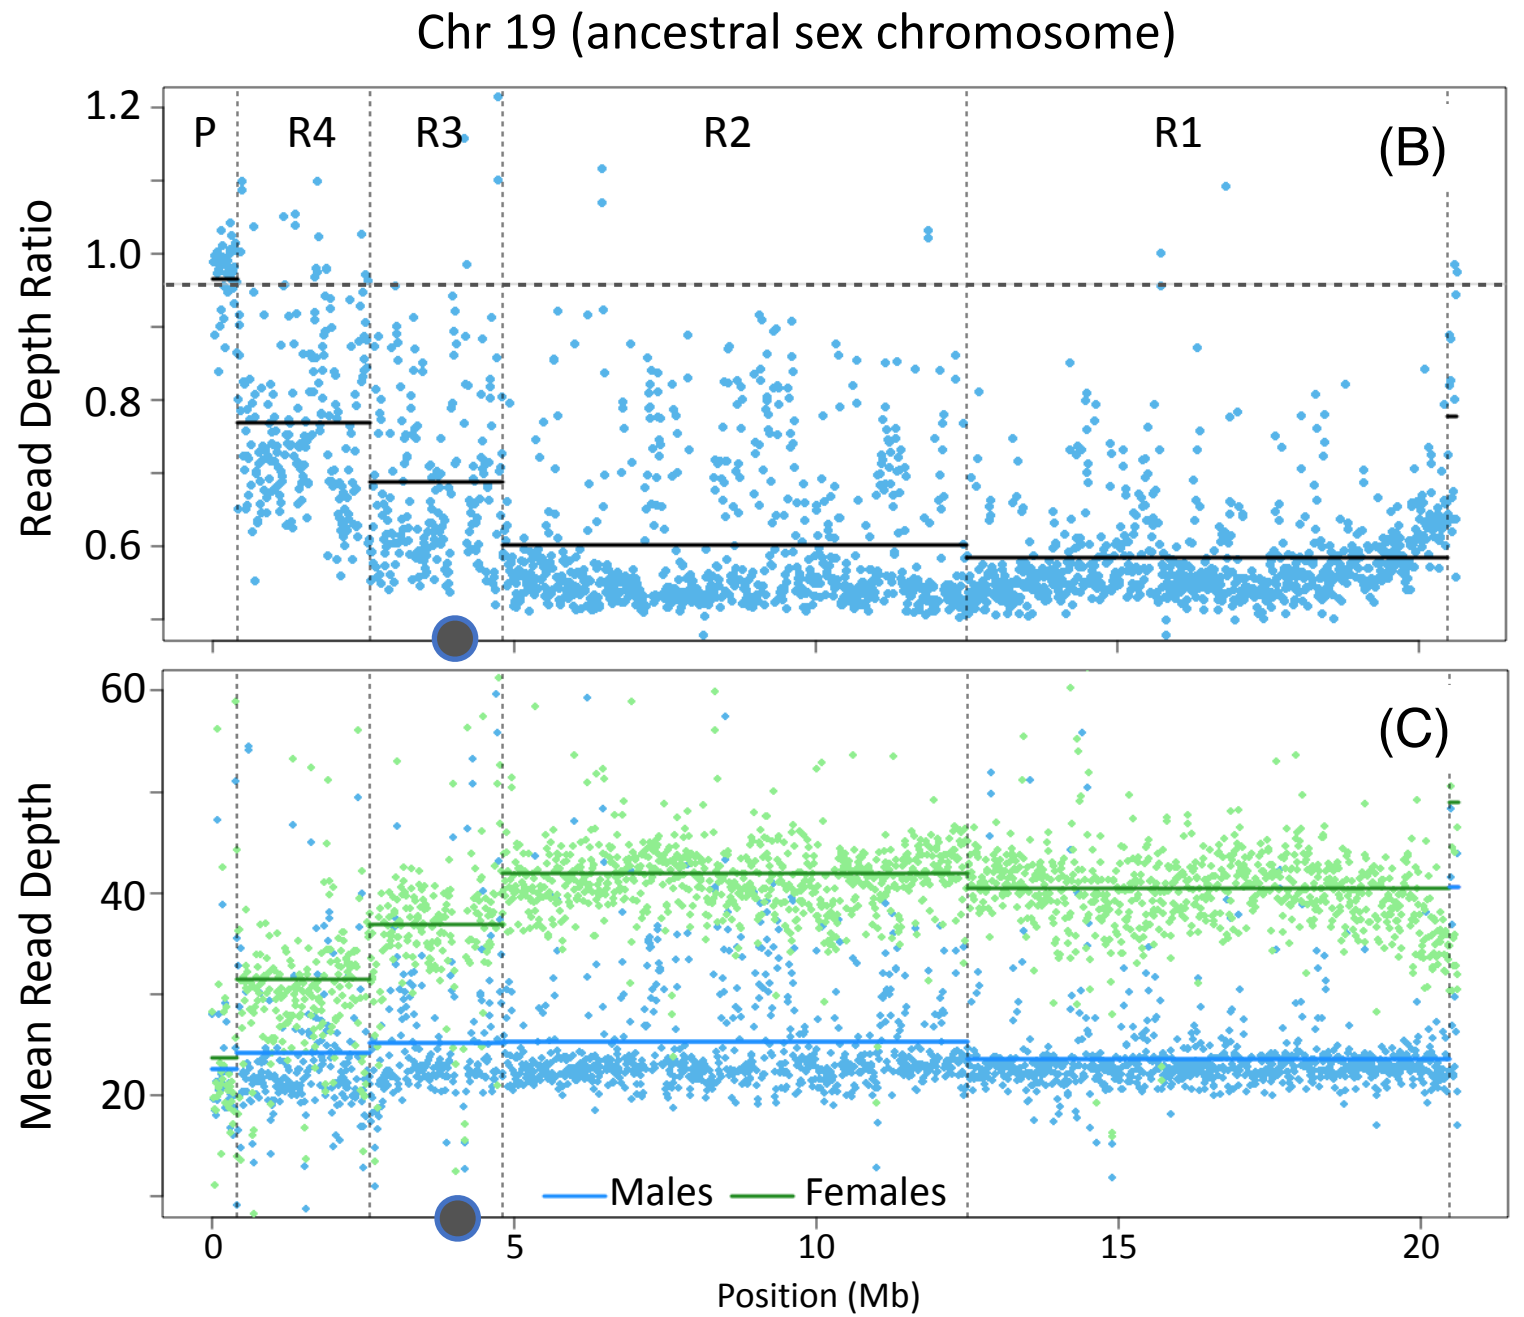

Figure 2

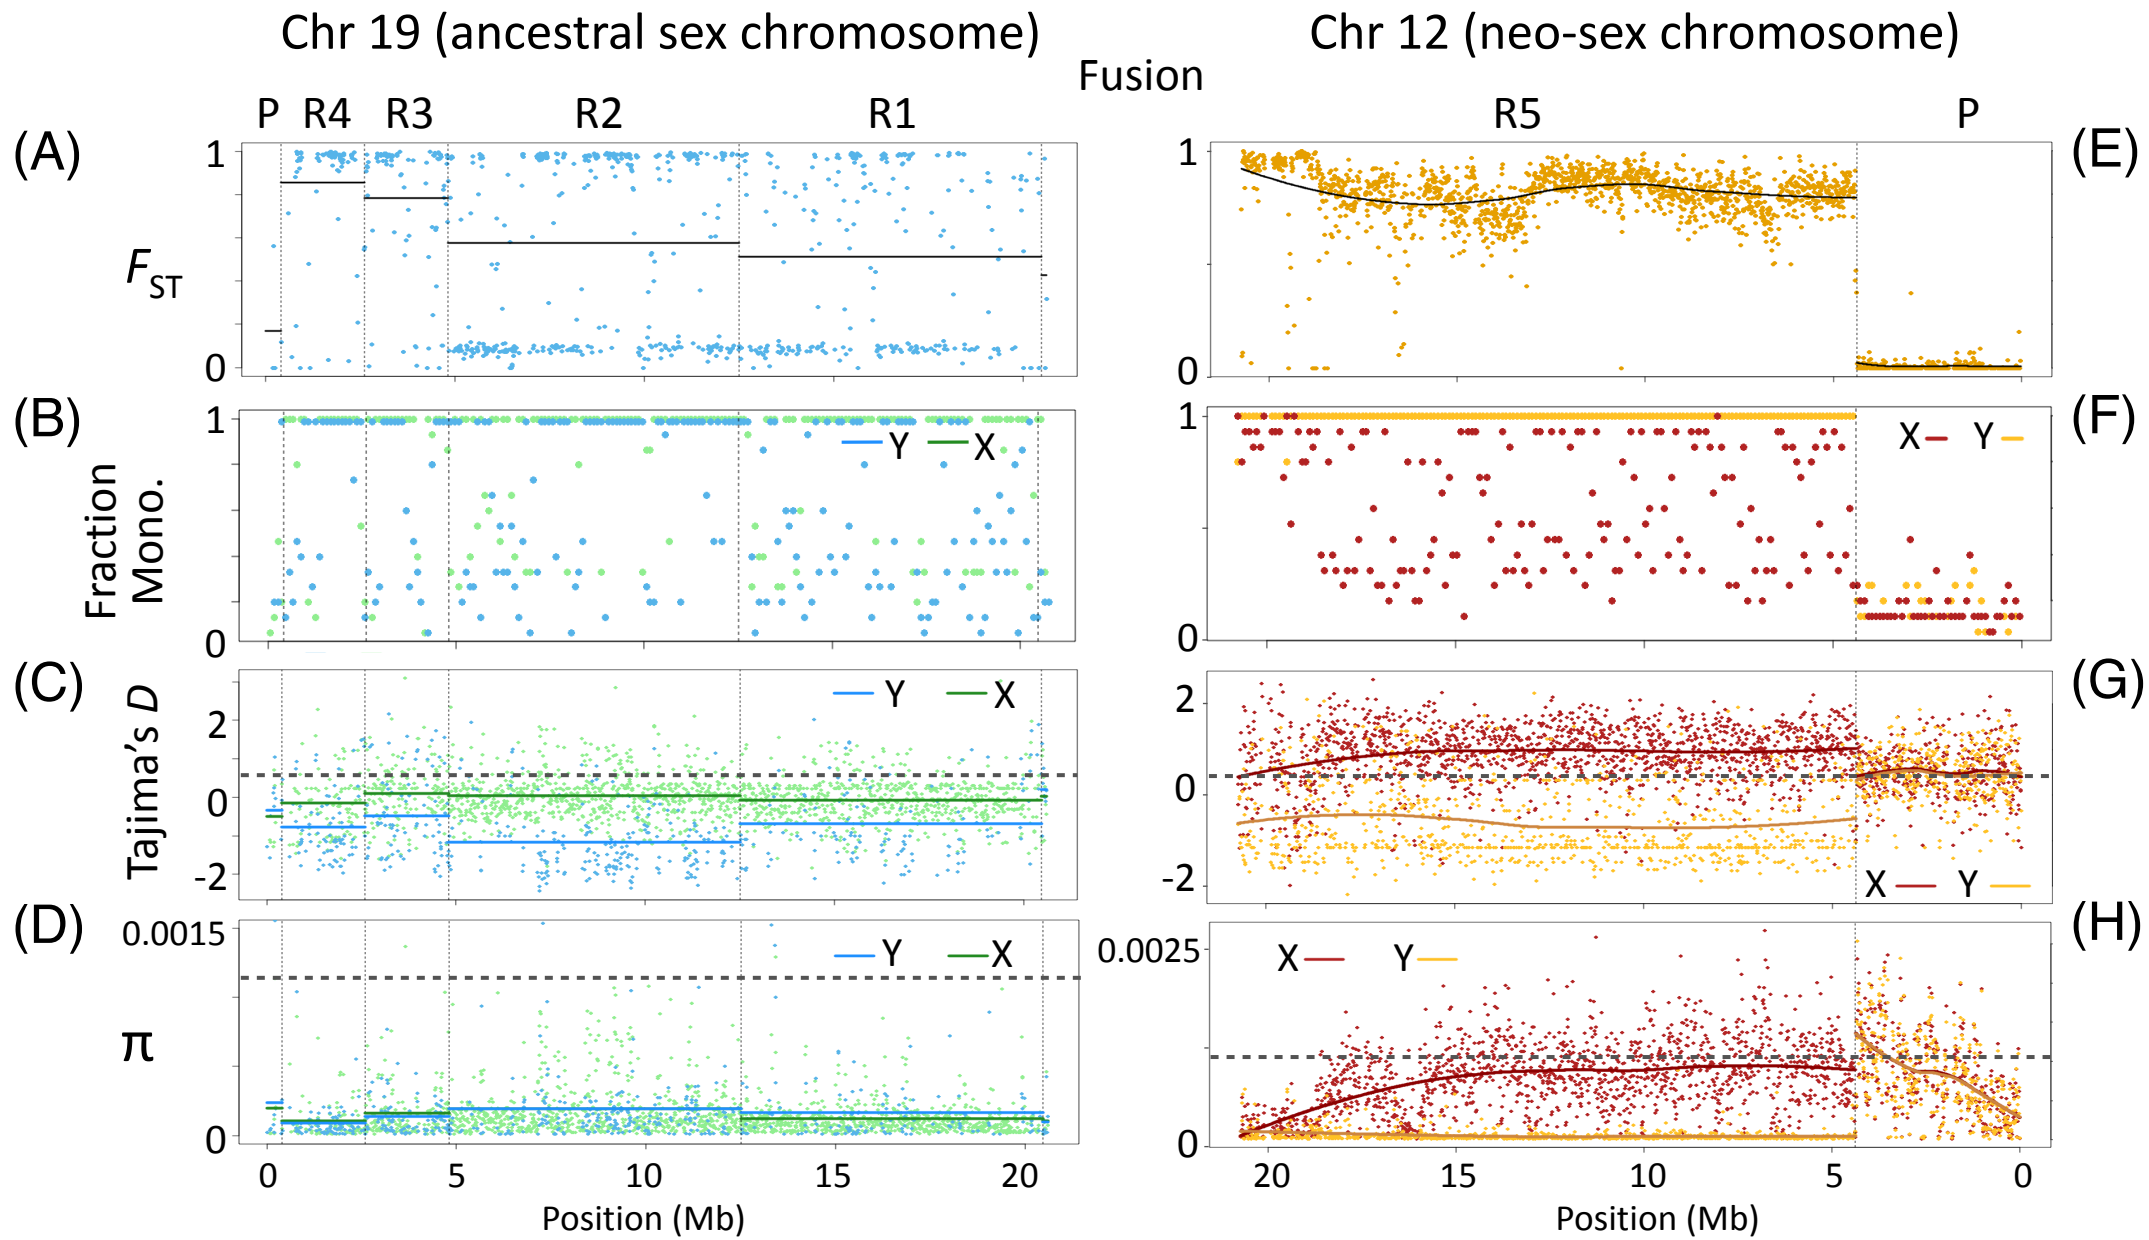

Figure 3

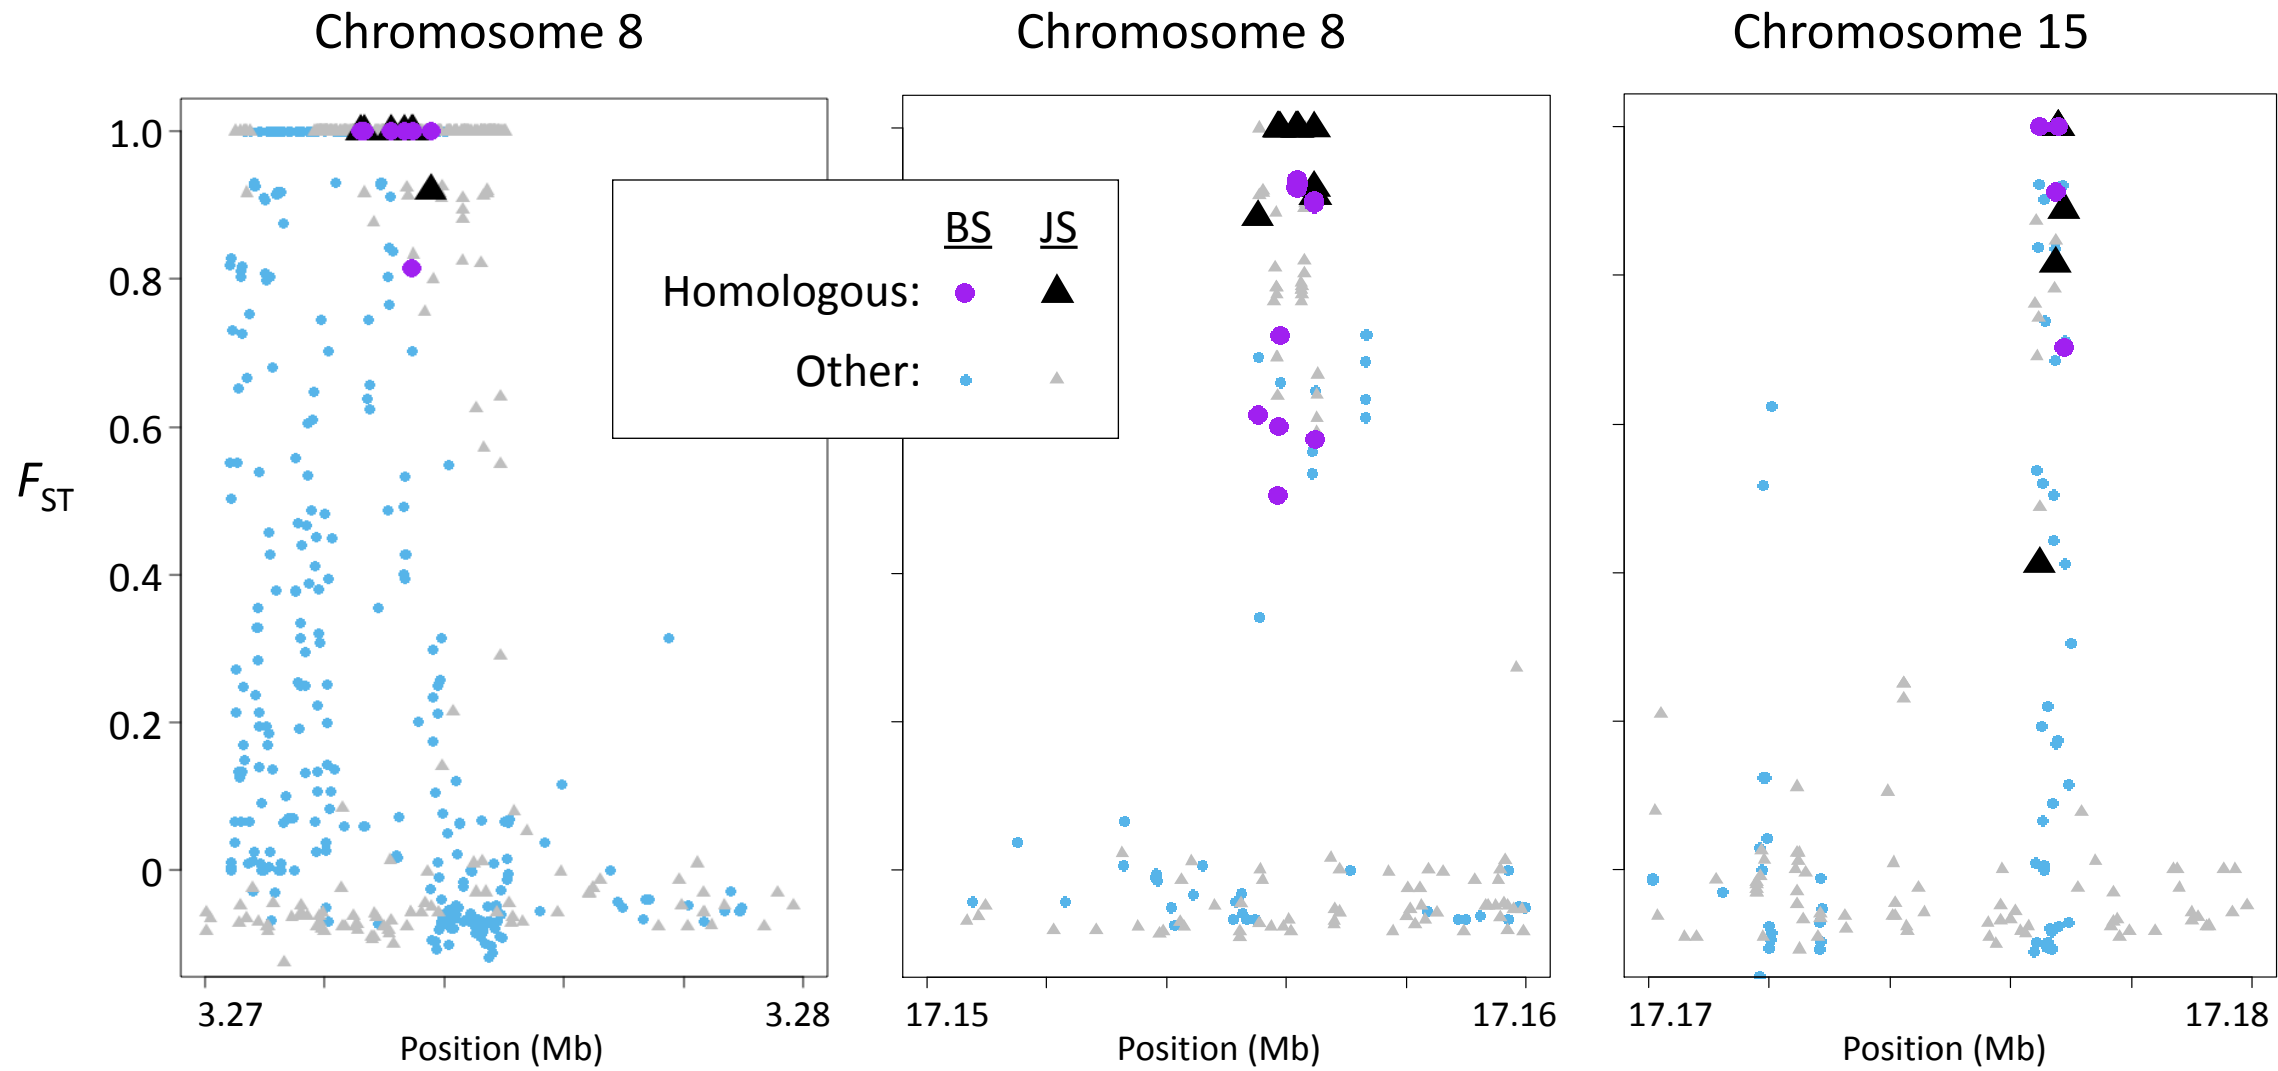

Figure 4

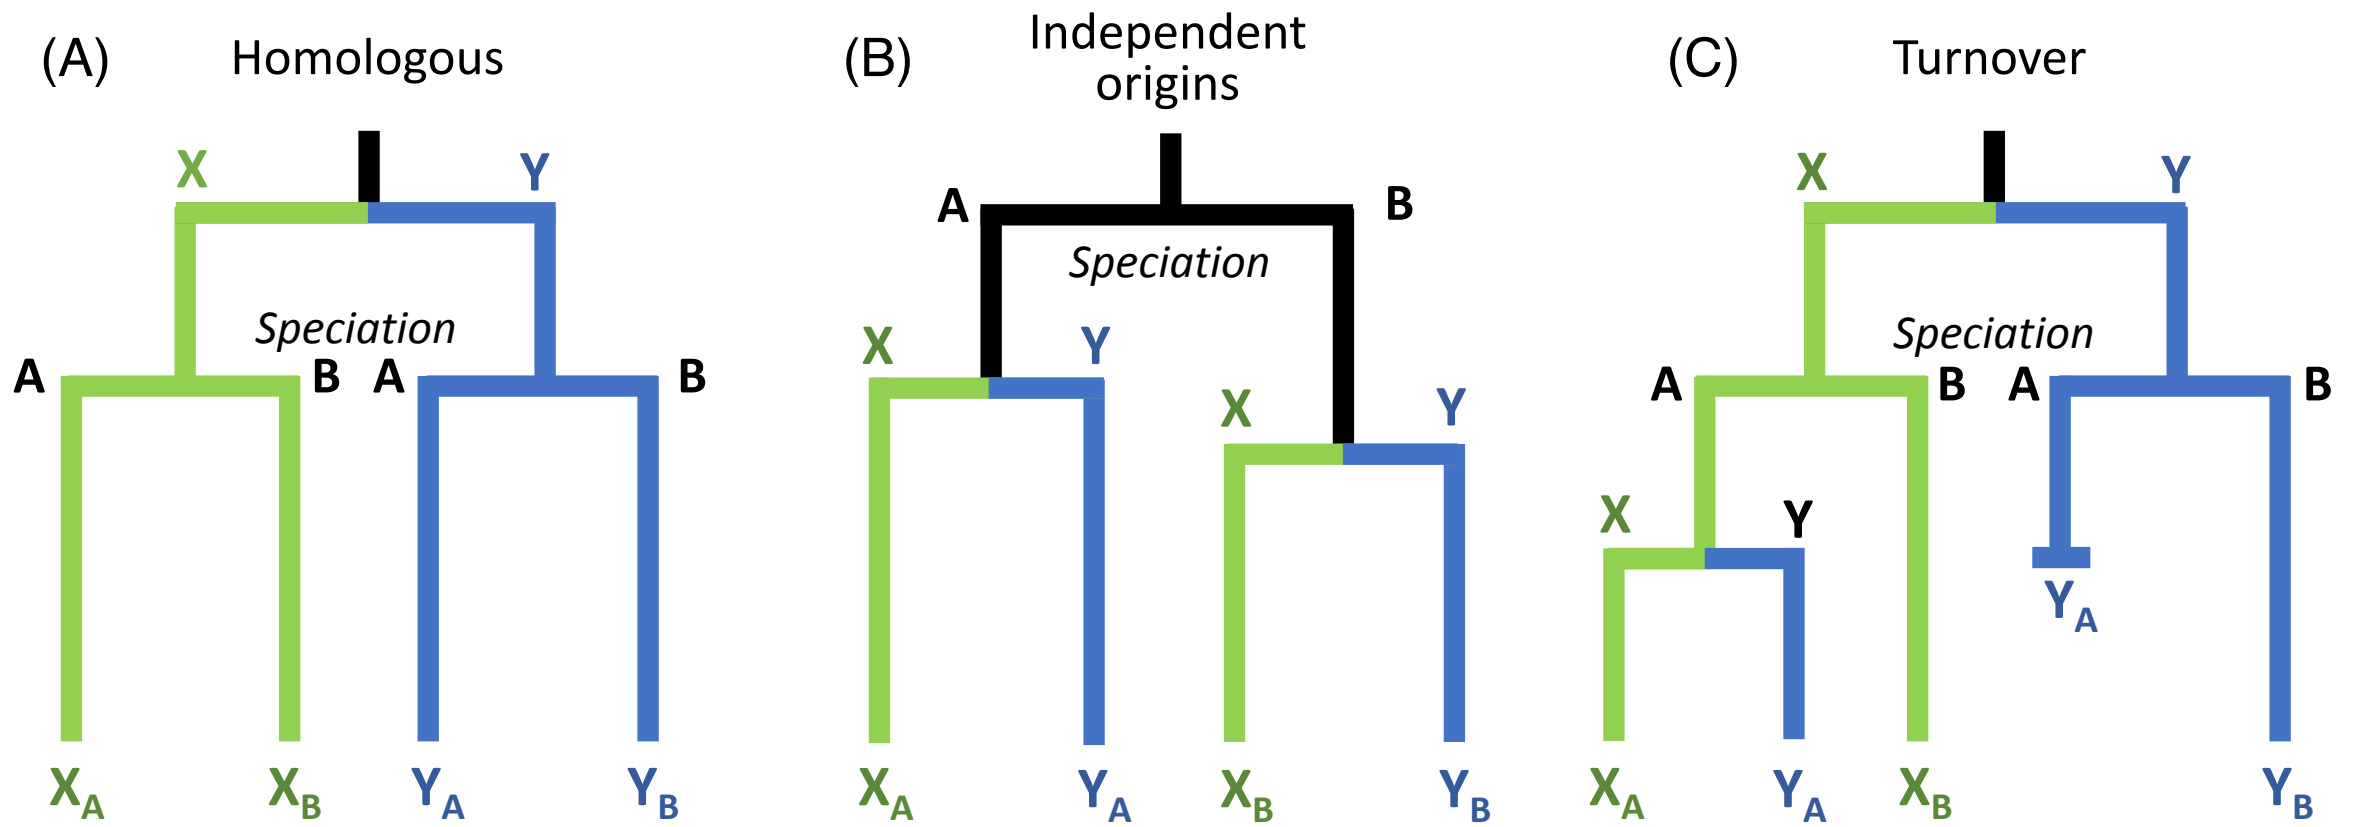

Figure 5



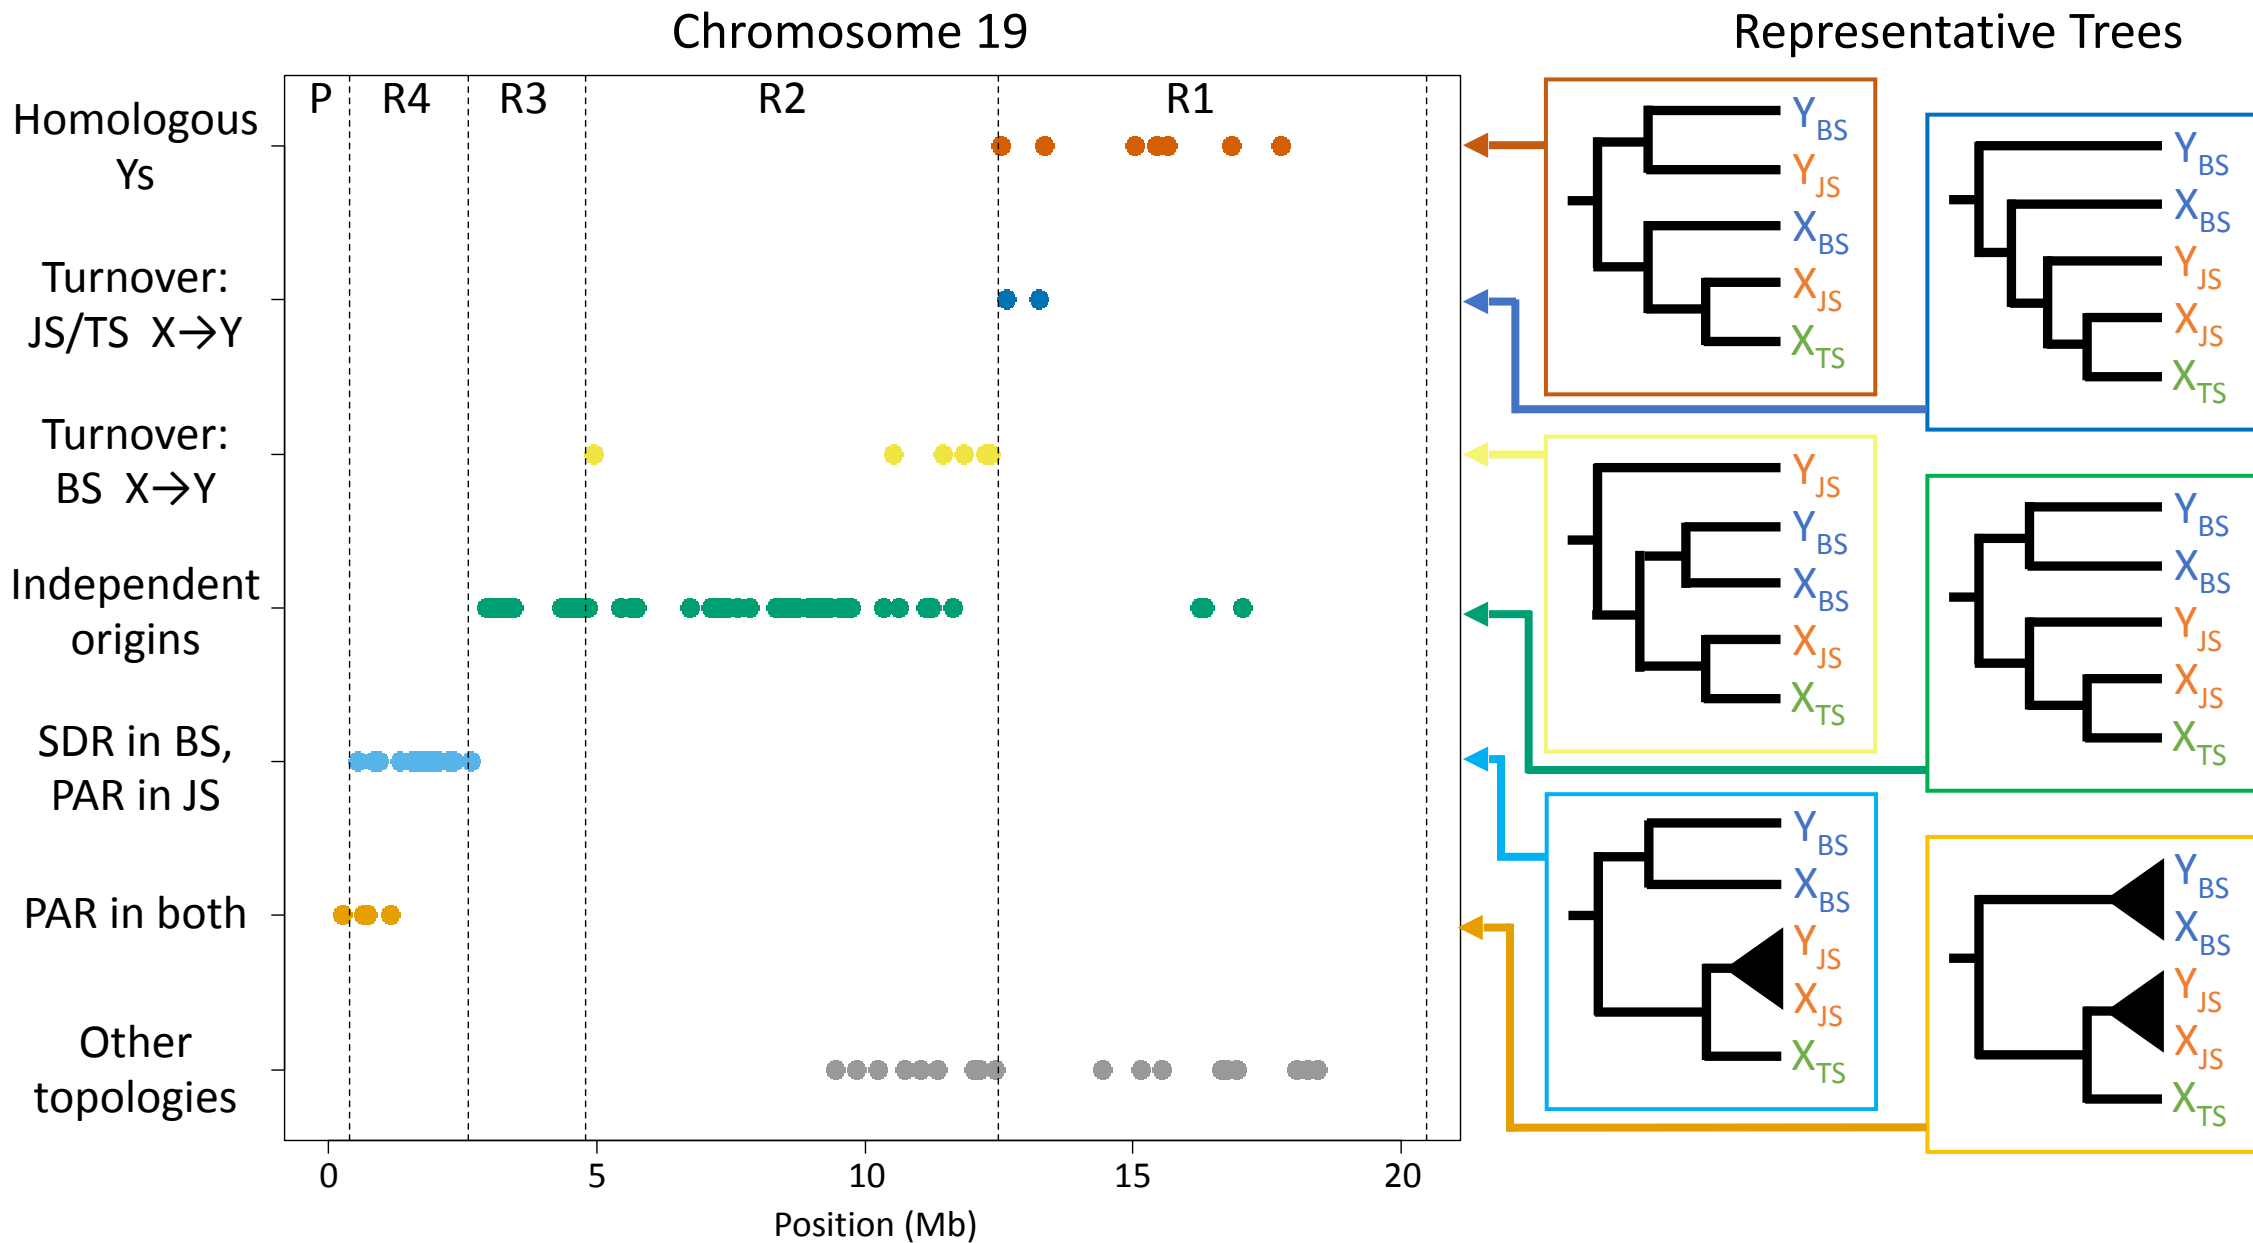

Figure 6

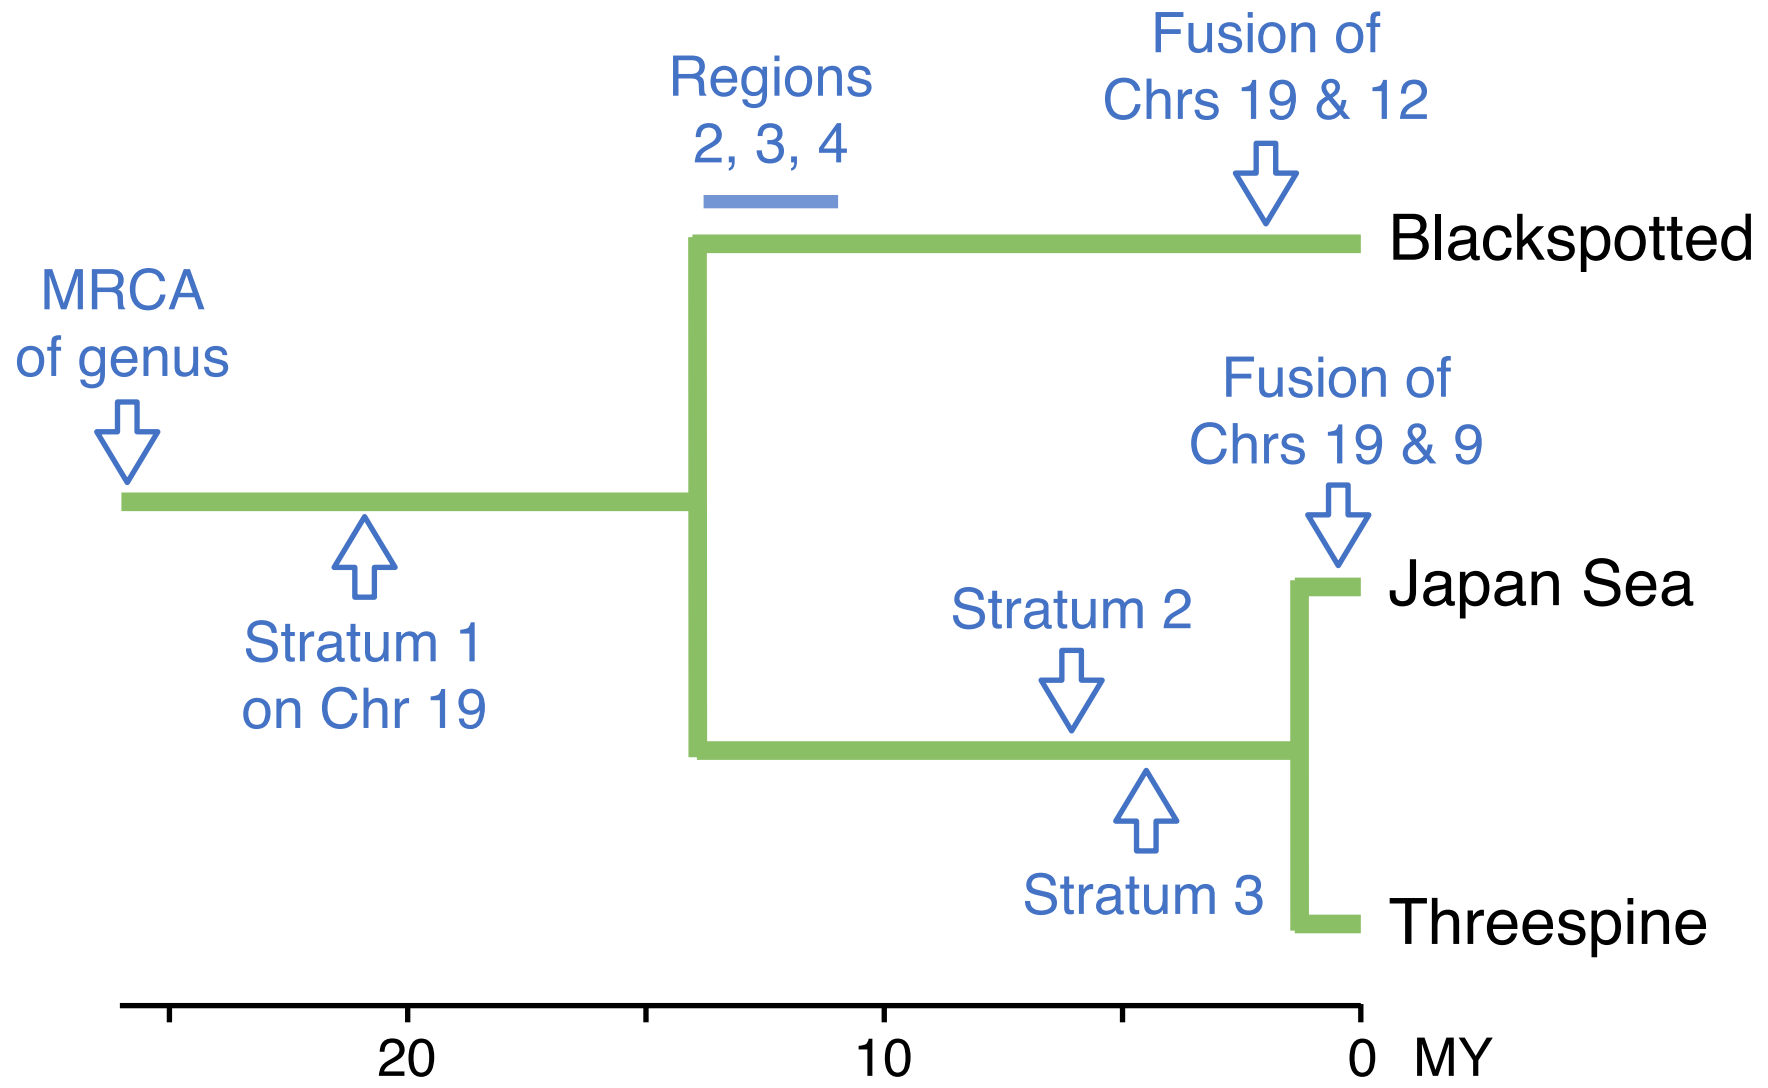

Figure 7

Chr 19 (ancestral sex chromosome)

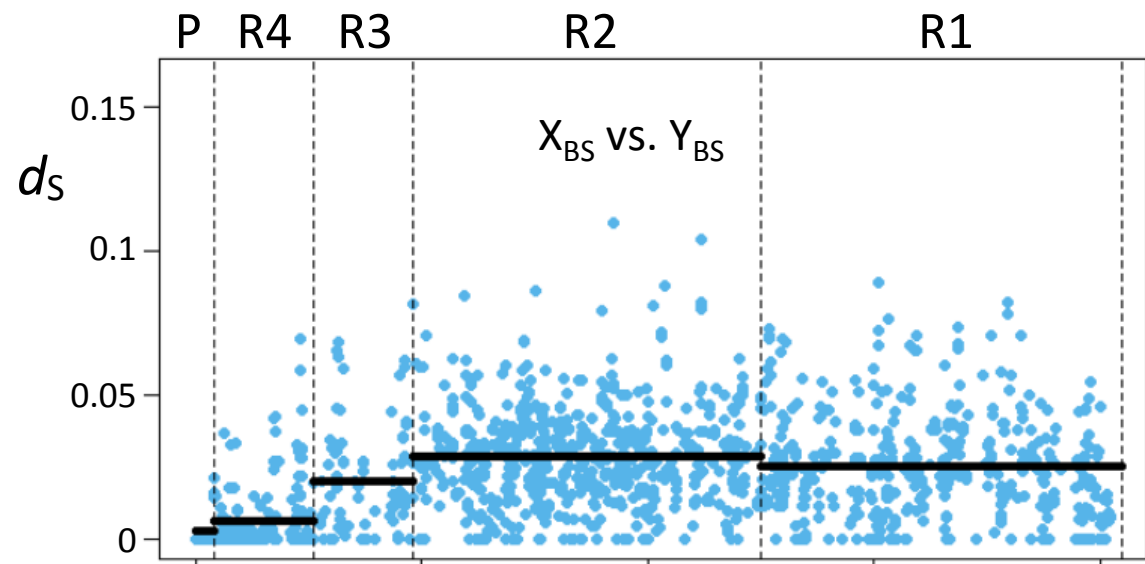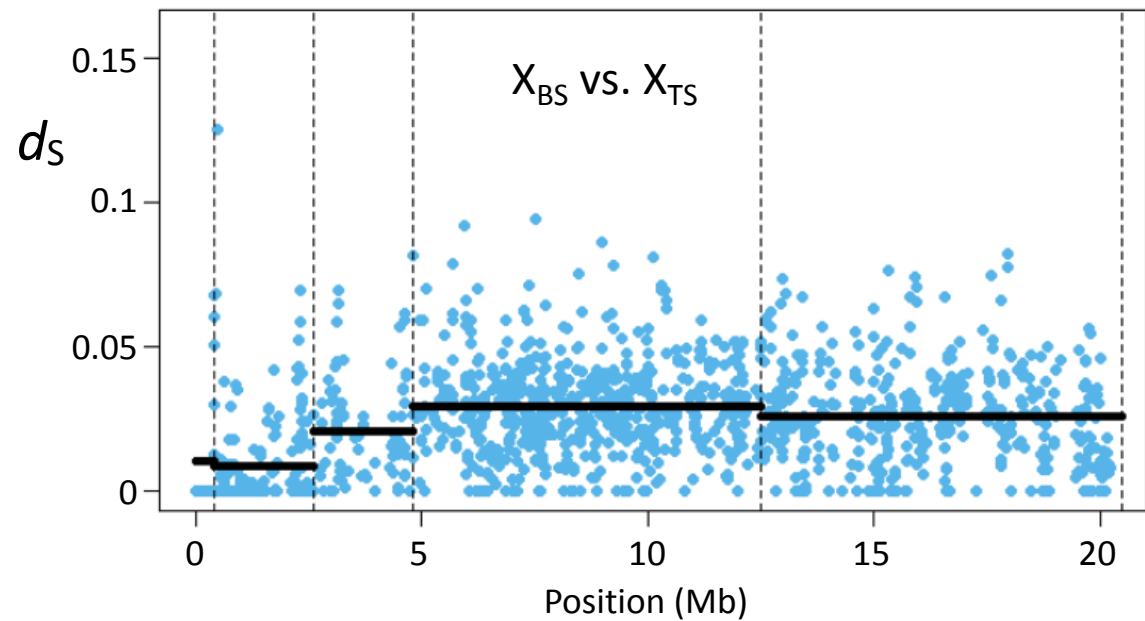

Chr 12 (neo-sex chromosome)

Fusion

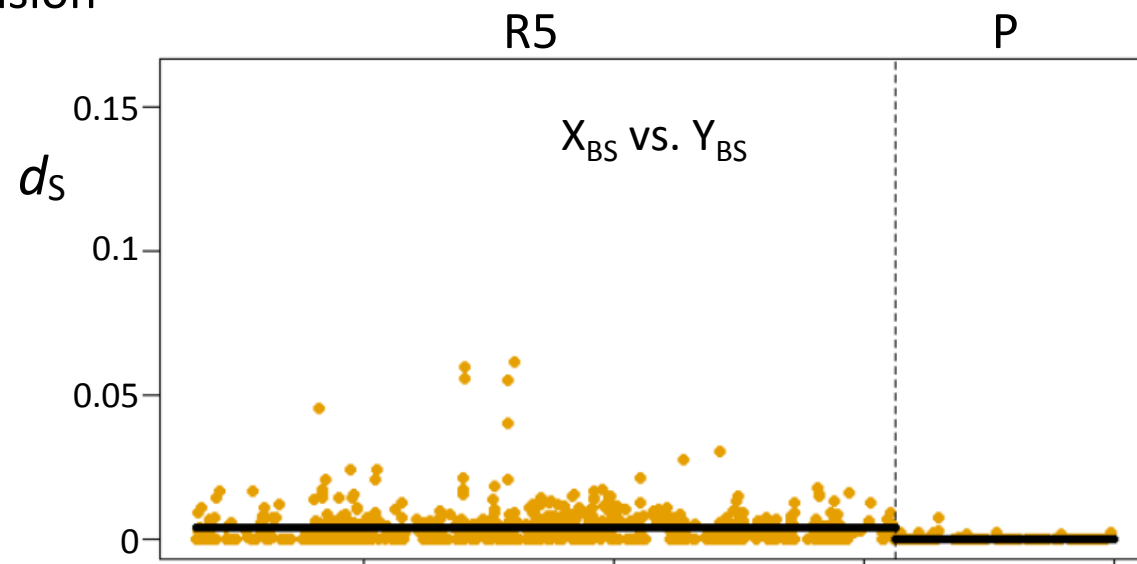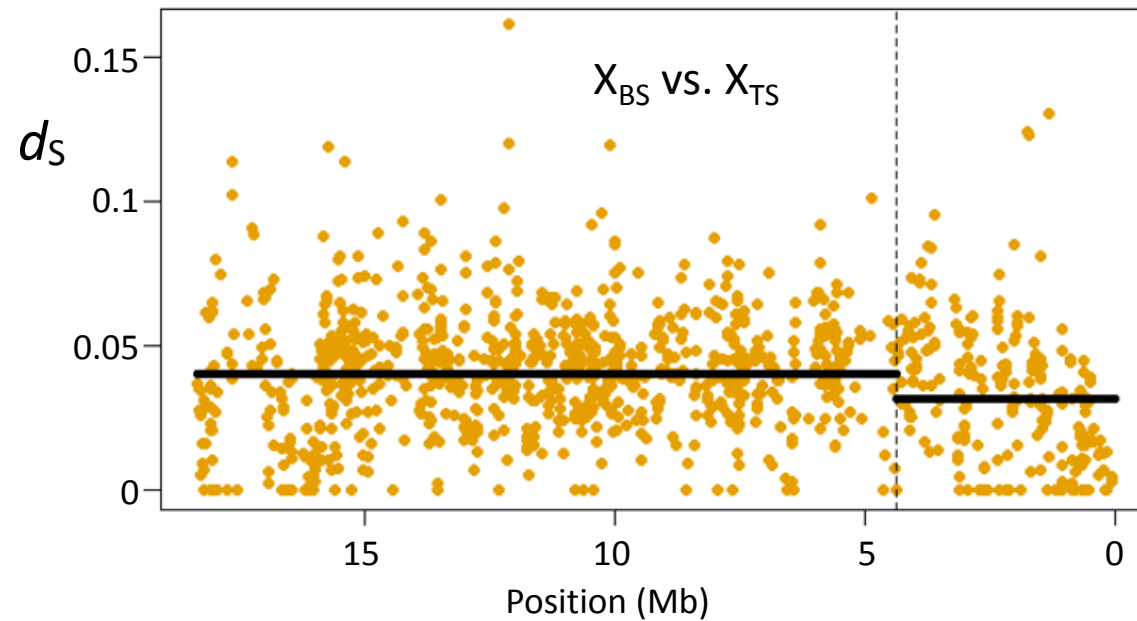

Chr 19 (ancestral sex chromosome)

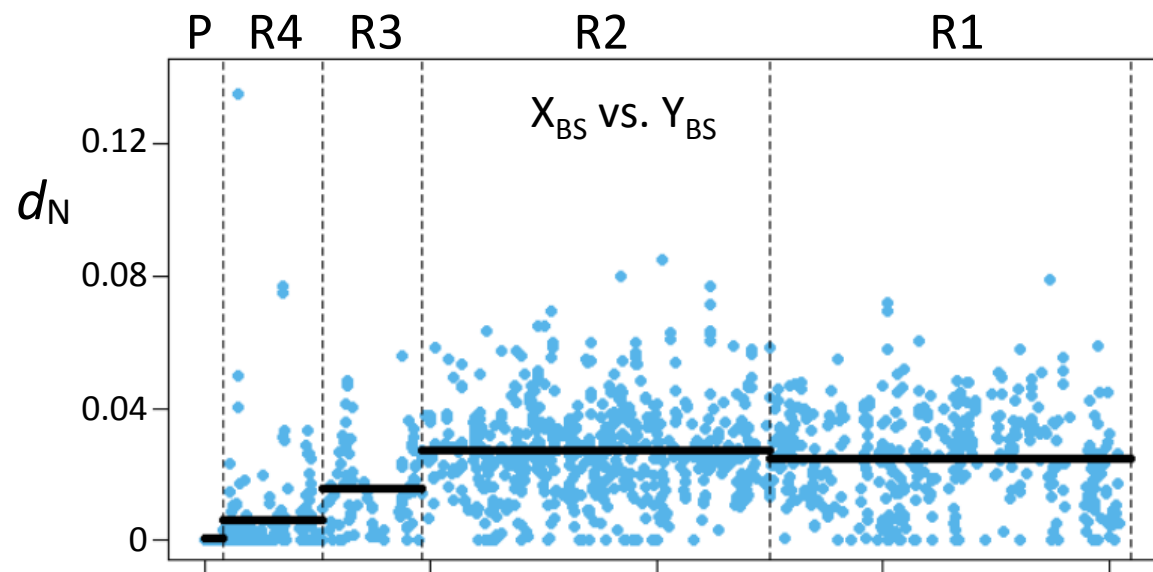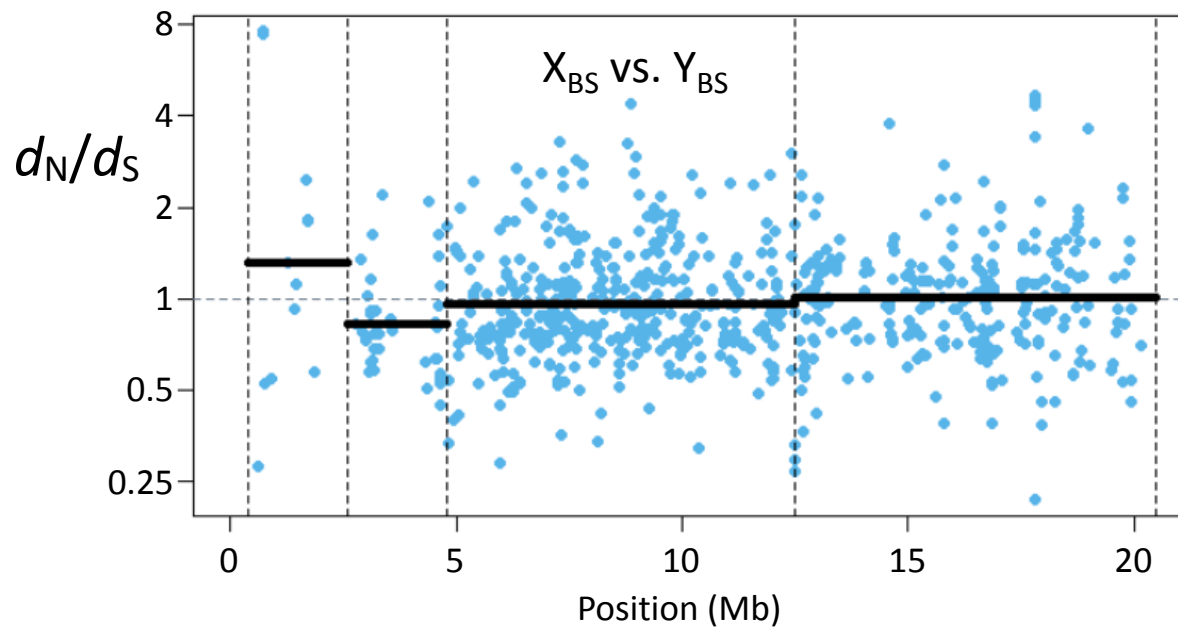

Chr 12 (neo-sex chromosome)

Fusion

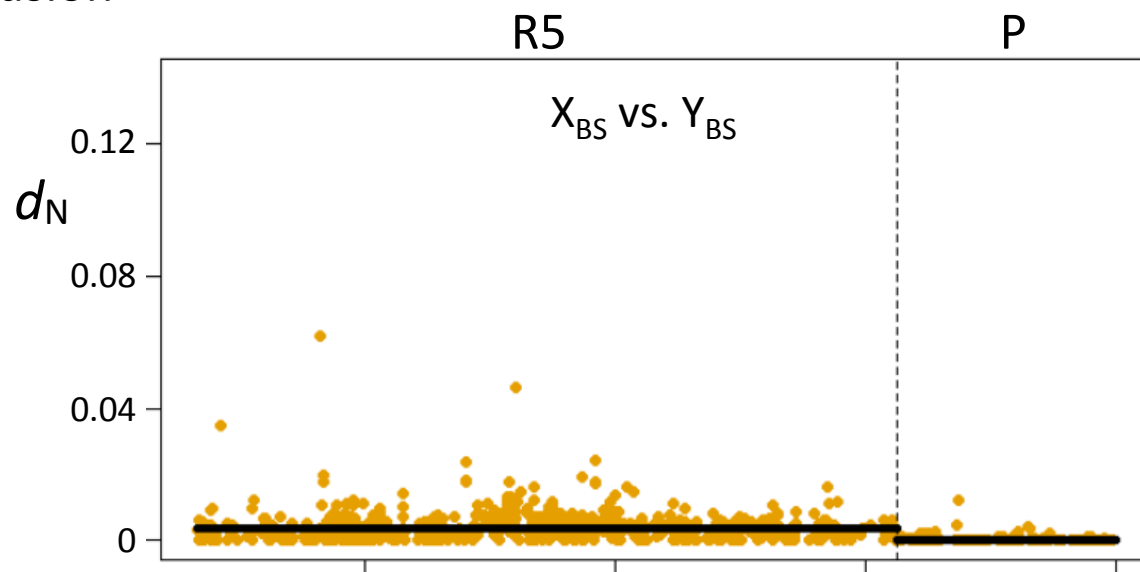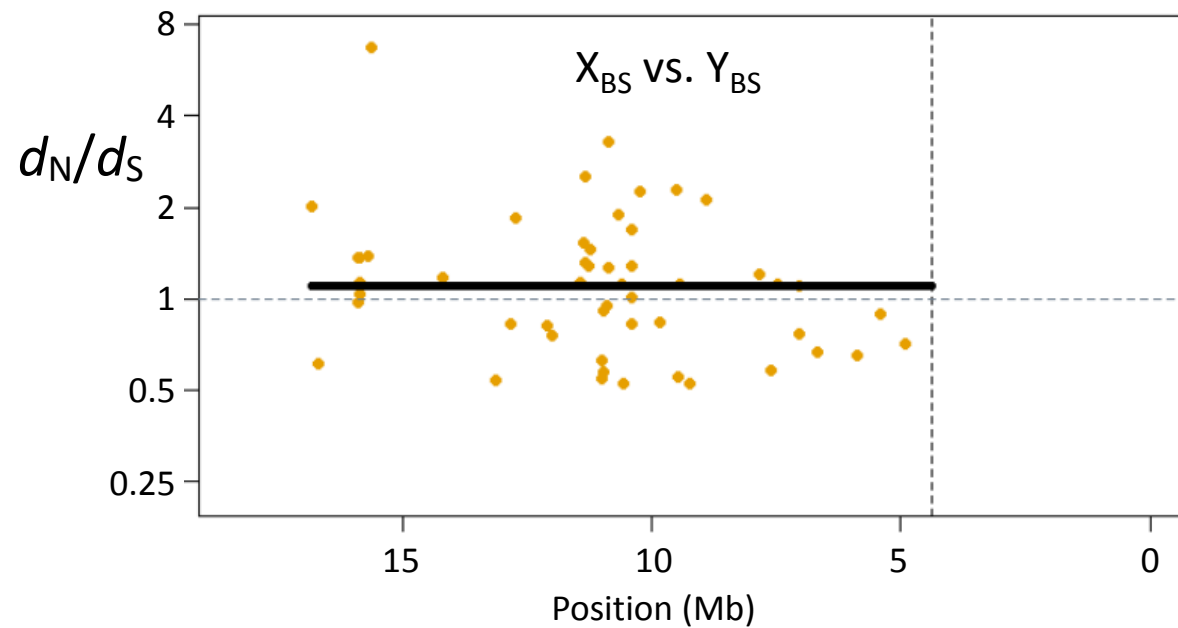

Chr 12 (neo-sex chromosome)

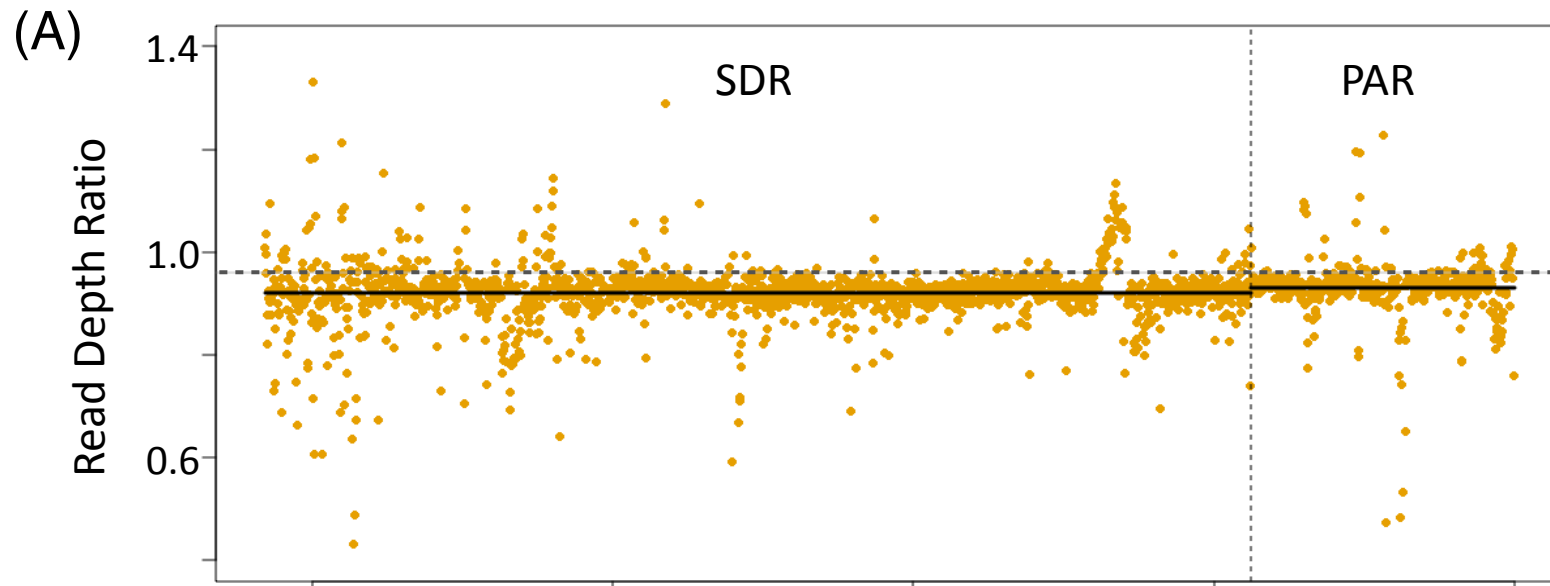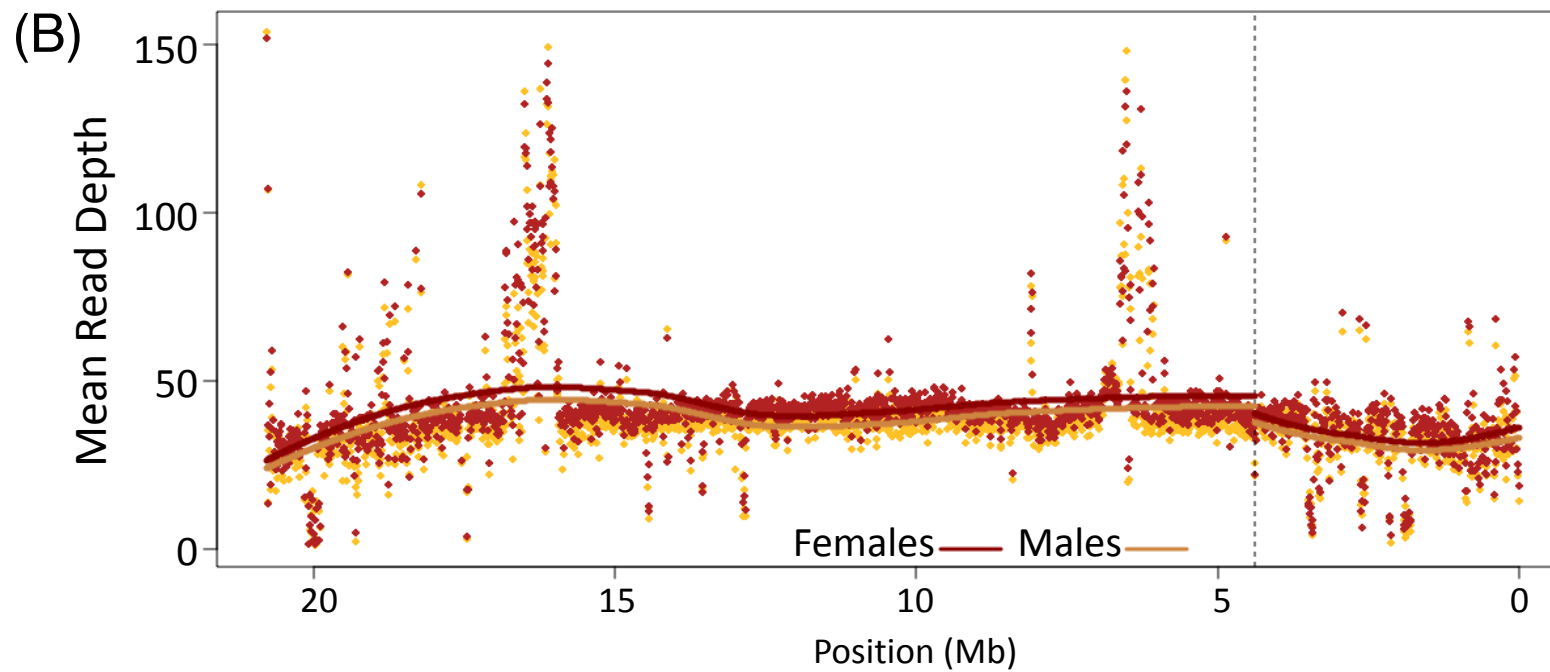

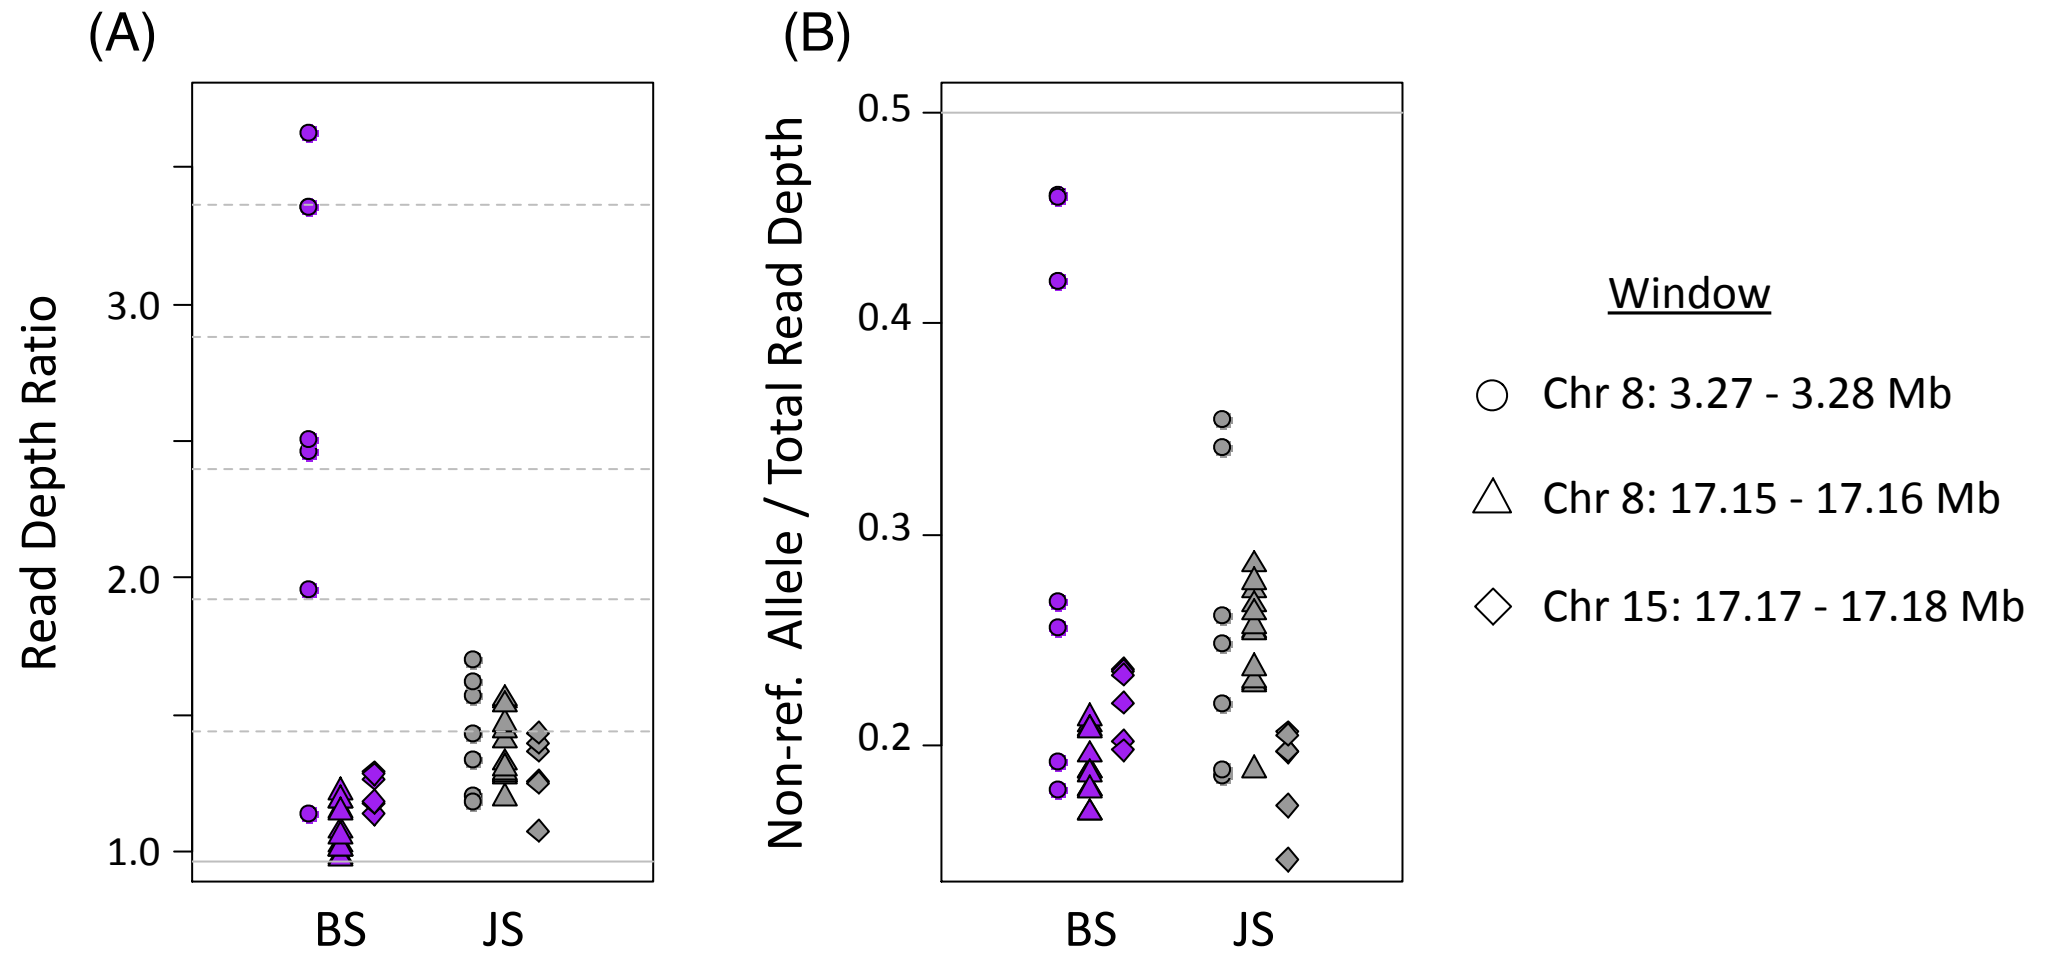

Supp. Fig. S4

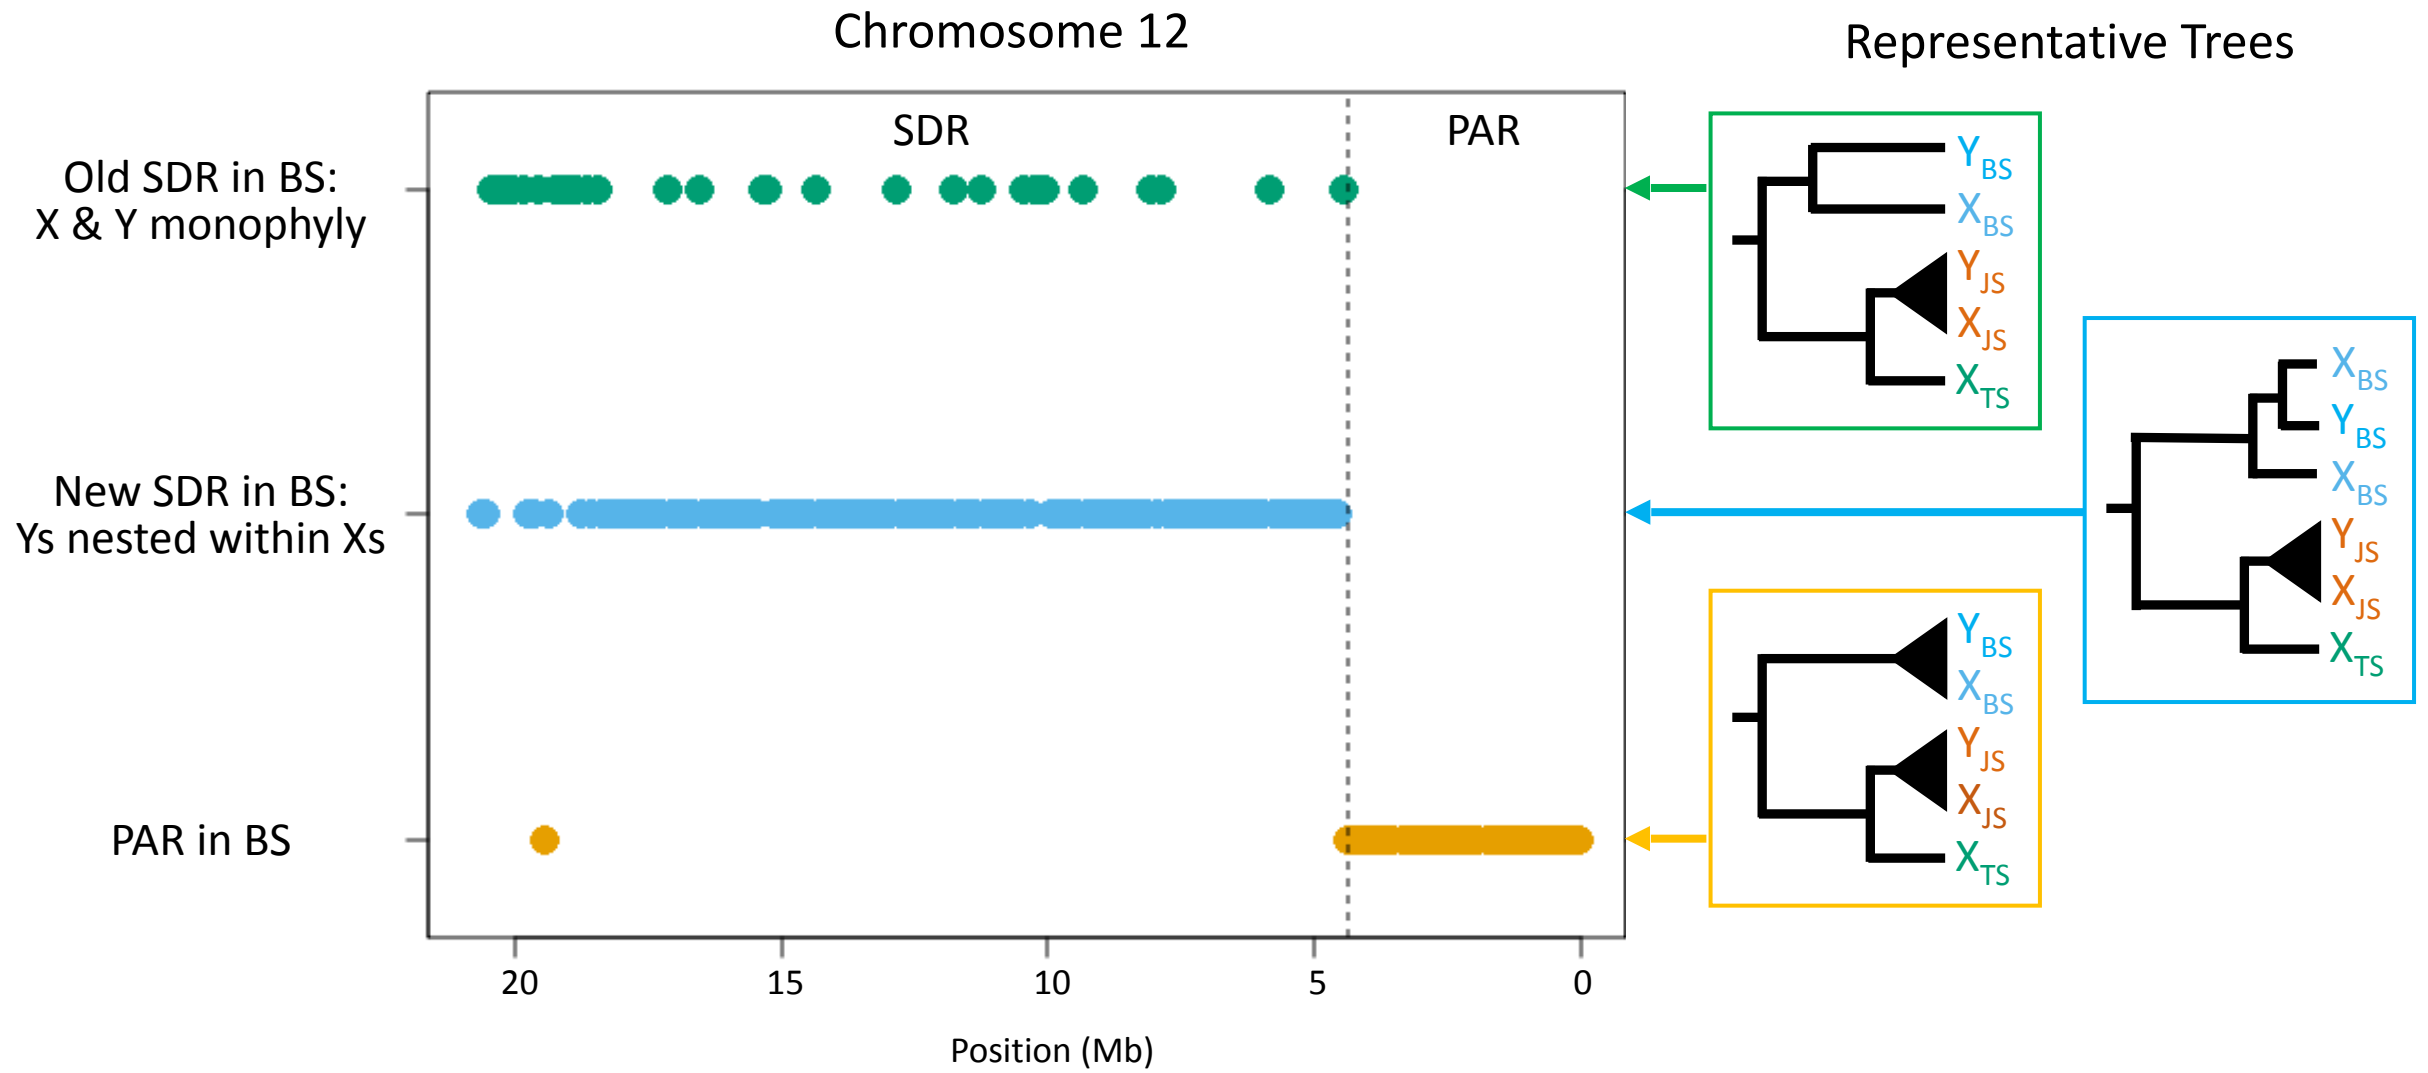

Supp. Fig. S5

787 **Literature Cited**

- 788 Abbott, J. K., A. K. Nordén, and B. Hansson. 2017. Sex chromosome evolution: historical insights and  
789 future perspectives. *Proceedings of the Royal Society B: Biological Sciences* 284:20162806.
- 790 Bachtrog, D. 2006. A dynamic view of sex chromosome evolution. *Current Opinion in Genetics &*  
791 *Development* 16:578-585.
- 792 —. 2008. The temporal dynamics of processes underlying Y chromosome degeneration. *Genetics*  
793 179:1513-1525.
- 794 —. 2013. Y-chromosome evolution: emerging insights into processes of Y-chromosome degeneration.  
795 *Nature Reviews Genetics* 14:113-124.
- 796 Bergero, R., and D. Charlesworth. 2009. The evolution of restricted recombination in sex chromosomes.  
797 *Trends in Ecology & Evolution* 24:94-102.
- 798 Bisseger, M., T. G. Laurentino, M. Roesti, and D. Berner. 2019. Widespread intersex differentiation  
799 across the stickleback genome—the signature of sexually antagonistic selection? *Molecular*  
800 *Ecology*.
- 801 Blackmon, H., and J. P. Demuth. 2015. The fragile Y hypothesis: Y chromosome aneuploidy as a  
802 selective pressure in sex chromosome and meiotic mechanism evolution. *BioEssays* 37:942-950.
- 803 Blaser, O., S. Neuenschwander, and N. Perrin. 2013. Sex-chromosome turnovers: the hot-potato model.  
804 *The American Naturalist* 183:140-146.
- 805 Charlesworth, B. 1991. The evolution of sex chromosomes. *Science* 251:1030-1033.
- 806 Charlesworth, B., and D. Charlesworth. 2000. The degeneration of Y chromosomes. *Philosophical*  
807 *Transactions of the Royal Society B: Biological Sciences* 355:1563.
- 808 Charlesworth, D. 2017. Evolution of recombination rates between sex chromosomes. *Philosophical*  
809 *Transactions of the Royal Society B: Biological Sciences* 372:20160456.
- 810 Charlesworth, D., and B. Charlesworth. 1980. Sex differences in fitness and selection for centric fusions  
811 between sex-chromosomes and autosomes. *Genetical Research* 35:205-214.
- 812 Charlesworth, D., B. Charlesworth, and G. Marais. 2005. Steps in the evolution of heteromorphic sex  
813 chromosomes. *Heredity* 95:118.
- 814 Chen, T.-R., and H. Reisman. 1970. A comparative chromosome study of the North American species of  
815 sticklebacks (Teleostei: Gasterosteidae). *Cytogenetic and Genome Research* 9:321-332.
- 816 Cortez, D., R. Marin, D. Toledo-Flores, L. Froidevaux, A. Liechti, P. D. Waters, F. Gruetzner et al. 2014.  
817 *Origins and functional evolution of Y chromosomes across mammals. Nature* 508:488-493.
- 818 Crowson, D., S. C. Barrett, and S. I. Wright. 2017. Purifying and positive selection influence patterns of  
819 gene loss and gene expression in the evolution of a plant sex chromosome system. *Molecular*  
820 *Biology and Evolution* 34:1140-1154.



- 821 Dagilis, A. J. 2019. Genetic interactions: epistasis, linkage and speciation, University of Texas at Austin.
- 822 Danecek, P., A. Auton, G. Abecasis, C. A. Albers, E. Banks, M. A. DePristo, R. E. Handsaker et al. 2011.
- 823 The variant call format and VCFtools. *Bioinformatics* 27:2156-2158.
- 824 Darolti, I., A. E. Wright, B. A. Sandkam, J. Morris, N. I. Bloch, M. Farré, R. C. Fuller et al. 2019.
- 825 Extreme heterogeneity in sex chromosome differentiation and dosage compensation in
- 826 livebearers. *Proceedings of the National Academy of Sciences of the United States of America*
- 827 116:19031-19036.
- 828 DePristo, M. A., E. Banks, R. Poplin, K. V. Garimella, J. R. Maguire, C. Hartl, A. A. Philippakis et al.
- 829 2011. A framework for variation discovery and genotyping using next-generation DNA
- 830 sequencing data. *Nature Genetics* 43:491.
- 831 Dixon, G., J. Kitano, and M. Kirkpatrick. 2018. The origin of a new sex chromosome by introgression
- 832 between two stickleback fishes. *Molecular Biology and Evolution* 36:28-38.
- 833 Fujito, S., S. Takahata, R. Suzuki, Y. Hoshino, N. Ohmido, and Y. Onodera. 2015. Evidence for a
- 834 common origin of homomorphic and heteromorphic sex chromosomes in distinct *Spinacia*
- 835 species. *G3: Genes, Genomes, Genetics* 5:1663-1673.
- 836 Glazer, A. M., E. E. Killingbeck, T. Mitros, D. S. Rokhsar, and C. T. Miller. 2015. Genome assembly
- 837 improvement and mapping convergently evolved skeletal traits in sticklebacks with genotyping-
- 838 by-sequencing. *G3: Genes| Genomes| Genetics* 5:1463-1472.
- 839 Goto, H., L. Peng, and K. D. Makova. 2009. Evolution of X-degenerate Y chromosome genes in greater
- 840 apes: conservation of gene content in human and gorilla, but not chimpanzee. *Journal of*
- 841 *Molecular Evolution* 68:134.
- 842 Graves, J. A. M. 2006. Sex chromosome specialization and degeneration in mammals. *Cell* 124:901-914.
- 843 Handley, L.-J. L., H. Ceplitis, and H. Ellegren. 2004. Evolutionary strata on the chicken Z chromosome:
- 844 implications for sex chromosome evolution. *Genetics* 167:367-376.
- 845 Hendry, A. P., D. I. Bolnick, D. Berner, and C. L. Peichel. 2009. Along the speciation continuum in
- 846 sticklebacks. *Journal of Fish Biology* 75:2000-2036.
- 847 Hohenlohe, P. A., S. Bassham, P. D. Etter, N. Stiffler, E. A. Johnson, and W. A. Cresko. 2010. Population
- 848 genomics of parallel adaptation in threespine stickleback using sequenced RAD tags. *PLoS*
- 849 *Genetics* 6:e1000862.
- 850 Hough, J., J. D. Hollister, W. Wang, S. C. Barrett, and S. I. Wright. 2014. Genetic degeneration of old
- 851 and young Y chromosomes in the flowering plant *Rumex hastatulus*. *Proceedings of the National*
- 852 *Academy of Sciences* 111:7713-7718.

- 853 Hughes, J. F., H. Skaletsky, T. Pyntikova, P. J. Minx, T. Graves, S. Rozen, R. K. Wilson et al. 2005.  
854 Conservation of Y-linked genes during human evolution revealed by comparative sequencing in  
855 chimpanzee. *Nature* 437:100-103.
- 856 Ieda, R., S. Hosoya, S. Tajima, K. Atsumi, T. Kamiya, A. Nozawa, Y. Aoki et al. 2018. Identification of  
857 the sex-determining locus in grass puffer (*Takifugu niphobles*) provides evidence for sex-  
858 chromosome turnover in a subset of *Takifugu* species. *PLOS One* 13:e0190635.
- 859 Jeffries, D. L., G. Lavanchy, R. Sermier, M. J. Sredl, I. Miura, A. Borzée, L. N. Barrow et al. 2018. A  
860 rapid rate of sex-chromosome turnover and non-random transitions in true frogs. *Nature*  
861 *Communications* 9:4088.
- 862 Kamiya, T., W. Kai, S. Tasumi, A. Oka, T. Matsunaga, N. Mizuno, M. Fujita et al. 2012. A trans-species  
863 missense SNP in *Amhr2* is associated with sex determination in the tiger pufferfish, *Takifugu*  
864 *rubripes* (fugu). *PLoS Genetics* 8:e1002798.
- 865 Kikuchi, K., and S. Hamaguchi. 2013. Novel sex-determining genes in fish and sex chromosome  
866 evolution. *Developmental Dynamics* 242:339-353.
- 867 Killick, R., and I. Eckley. 2014. changepoint: An R package for changepoint analysis. *Journal of*  
868 *Statistical Software* 58:1-19.
- 869 Kitano, J., J. A. Ross, S. Mori, M. Kume, F. C. Jones, Y. F. Chan, D. M. Absher et al. 2009. A role for a  
870 neo-sex chromosome in stickleback speciation. *Nature* 461:1079-1083.
- 871 Lahn, B. T., and D. C. Page. 1999. Four evolutionary strata on the human X chromosome. *Science*  
872 286:964-967.
- 873 Leder, E. H., J. M. Cano, T. Leinonen, R. B. O'Hara, M. Nikinmaa, C. R. Primmer, and J. Merilä. 2010.  
874 Female-biased expression on the X chromosome as a key step in sex chromosome evolution in  
875 threespine sticklebacks. *Molecular Biology and Evolution* 27:1495-1503.
- 876 Li, H., and R. Durbin. 2010. Fast and accurate long-read alignment with Burrows–Wheeler transform.  
877 *Bioinformatics* 26:589-595.
- 878 Li, H., B. Handsaker, A. Wysoker, T. Fennell, J. Ruan, N. Homer, G. Marth et al. 2009. The Sequence  
879 Alignment/Map format and SAMtools. *Bioinformatics* 25:2078-2079.
- 880 Matsumoto, T., and J. Kitano. 2016. The intricate relationship between sexually antagonistic selection and  
881 the evolution of sex chromosome fusions. *Journal of Theoretical Biology* 404:97-108.
- 882 Meisel, R. P., C. A. Gonzales, and H. Luu. 2017. The house fly Y Chromosome is young and minimally  
883 differentiated from its ancient X Chromosome partner. *Genome research* 27:1417-1426.
- 884 Natri, H. M., J. Merilä, and T. Shikano. 2019. The evolution of sex determination associated with a  
885 chromosomal inversion. *Nature Communications* 10:145.

- 886 Natri, H. M., T. Shikano, and J. Merilä. 2013. Progressive recombination suppression and differentiation  
887 in recently evolved neo-sex chromosomes. *Molecular Biology and Evolution* 30:1131-1144.
- 888 Palmer, D. H., T. F. Rogers, R. Dean, and A. E. Wright. 2019. How to identify sex chromosomes and  
889 their turnover. *Molecular Ecology* 28:4709-4724.
- 890 Papadopulos, A. S., M. Chester, K. Ridout, and D. A. Filatov. 2015. Rapid Y degeneration and dosage  
891 compensation in plant sex chromosomes. *Proceedings of the National Academy of Sciences*  
892 112:13021-13026.
- 893 Peichel, C. L., S. R. McCann, J. A. Ross, A. F. S. Naftaly, J. R. Urton, J. N. Cech, J. Grimwood et al. *in*  
894 *press*. Assembly of a young vertebrate Y chromosome reveals convergent signatures of sex  
895 chromosome evolution. *Genome Biology*.
- 896 Peichel, C. L., J. A. Ross, C. K. Matson, M. Dickson, J. Grimwood, J. Schmutz, R. M. Myers et al. 2004.  
897 The master sex-determination locus in threespine sticklebacks is on a nascent Y chromosome.  
898 *Current Biology* 14:1416-1424.
- 899 Pennell, M. W., M. Kirkpatrick, S. P. Otto, J. C. Vamosi, C. L. Peichel, N. Valenzuela, and J. Kitano.  
900 2015. Y fuse? Sex chromosome fusions in fishes and reptiles. *PLoS Genetics* 11:e1005237.
- 901 Popescu, A.-A., K. T. Huber, and E. Paradis. 2012. ape 3.0: New tools for distance-based phylogenetics  
902 and evolutionary analysis in R. *Bioinformatics* 28:1536-1537.
- 903 Ravinet, M., K. Yoshida, S. Shigenobu, A. Toyoda, A. Fujiyama, and J. Kitano. 2018. The genomic  
904 landscape at a late stage of stickleback speciation: High genomic divergence interspersed by  
905 small localized regions of introgression. *PLoS Genetics* 14:e1007358.
- 906 Revell, L. J. 2012. phytools: an R package for phylogenetic comparative biology (and other things).  
907 *Methods in Ecology and Evolution* 3:217-223.
- 908 Rice, W. R. 1987. The accumulation of sexually antagonistic genes as a selective agent promoting the  
909 evolution of reduced recombination between primitive sex chromosomes. *Evolution* 41:911-914.
- 910 —. 1994. Degeneration of a nonrecombining chromosome. *Science* 263:230-232.
- 911 Roesti, M., D. Moser, and D. Berner. 2013. Recombination in the threespine stickleback genome—  
912 patterns and consequences. *Molecular Ecology* 22:3014-3027.
- 913 Ross, J. A., and C. L. Peichel. 2008. Molecular cytogenetic evidence of rearrangements on the Y  
914 chromosome of the threespine stickleback fish. *Genetics* 179:2173-2182.
- 915 Ross, J. A., J. R. Urton, J. Boland, M. D. Shapiro, and C. L. Peichel. 2009. Turnover of sex chromosomes  
916 in the stickleback fishes (Gasterosteidae). *PLoS Genetics* 5:e1000391.
- 917 Sardell, J. M., C. Cheng, A. J. Dagilis, A. Ishikawa, J. Kitano, C. L. Peichel, and M. Kirkpatrick. 2018.  
918 Sex differences in recombination in sticklebacks. *G3: Genes, Genomes, Genetics* 8:1971-1983.

- 919 Sardell, J. M., and M. Kirkpatrick. 2020. Sex differences in the recombination landscape. *The American*  
920 *Naturalist* 195:000-000.
- 921 Schultheiß, R., H. M. Viitaniemi, and E. H. Leder. 2015. Spatial dynamics of evolving dosage  
922 compensation in a young sex chromosome system. *Genome Biology and Evolution* 7:581-590.
- 923 Shanfelter, A. F., S. L. Archambeault, and M. A. White. 2019. Divergent fine-scale recombination  
924 landscapes between a freshwater and marine population of threespine stickleback fish. *Genome*  
925 *Biology and Evolution* 11:1573.
- 926 Shapiro, M. D., B. R. Summers, S. Balabhadra, J. T. Aldenhoven, A. L. Miller, C. B. Cunningham, M. A.  
927 Bell et al. 2009. The genetic architecture of skeletal convergence and sex determination in  
928 ninespine sticklebacks. *Current Biology* 19:1140-1145.
- 929 Stamatakis, A. 2014. RAxML version 8: a tool for phylogenetic analysis and post-analysis of large  
930 phylogenies. *Bioinformatics* 30:1312-1313.
- 931 Tanaka, K., Y. Takehana, K. Naruse, S. Hamaguchi, and M. Sakaizumi. 2007. Evidence for different  
932 origins of sex chromosomes in closely related *Oryzias* fishes: substitution of the master sex-  
933 determining gene. *Genetics* 177:2075-2081.
- 934 Toups, M. A., N. Rodrigues, N. Perrin, and M. Kirkpatrick. 2019. A reciprocal translocation radically  
935 reshapes sex-linked inheritance in the common frog. *Molecular Ecology*:doi: 10.1111/mec.14990.
- 936 van Doorn, G. S., and M. Kirkpatrick. 2007. Turnover of sex chromosomes induced by sexual conflict.  
937 *Nature* 449:909-912.
- 938 van Doorn, G. S., and M. Kirkpatrick. 2010. Transitions between male and female heterogamety caused  
939 by sex-antagonistic selection. *Genetics* 186:629-645.
- 940 Varadharajan, S., P. Rastas, A. Löytynoja, M. Matschiner, F. C. Calboli, B. Guo, A. J. Nederbragt et al.  
941 2019. A high-quality assembly of the nine-spined stickleback (*Pungitius pungitius*) genome.  
942 *Genome Biology and Evolution* 11:3291-3308.
- 943 Vicoso, B. 2019. Molecular and evolutionary dynamics of animal sex-chromosome turnover. *Nature*  
944 *Ecology & Evolution*:1-10.
- 945 Vicoso, B., and D. Bachtrog. 2013. Reversal of an ancient sex chromosome to an autosome in  
946 *Drosophila*. *Nature* 499:332-335.
- 947 —. 2015. Numerous transitions of sex chromosomes in Diptera. *PLOS Biology* 13.
- 948 Vicoso, B., J. Emerson, Y. Zektser, S. Mahajan, and D. Bachtrog. 2013. Comparative sex chromosome  
949 genomics in snakes: differentiation, evolutionary strata, and lack of global dosage compensation.  
950 *PLoS Biology* 11.

- 951 White, M. A., J. Kitano, and C. L. Peichel. 2015. Purifying selection maintains dosage-sensitive genes  
952 during degeneration of the threespine stickleback Y chromosome. *Molecular Biology and*  
953 *Evolution* 32:1981-1995.
- 954 Wootton, R. J. 1976, *Biology of the sticklebacks*. London, Academic Press.
- 955 Wright, A. E., R. Dean, F. Zimmer, and J. E. Mank. 2016. How to make a sex chromosome. *Nature*  
956 *Communications* 7.
- 957 Xu, L., G. Auer, V. Peona, A. Suh, Y. Deng, S. Feng, G. Zhang et al. 2019a. Dynamic evolutionary  
958 history and gene content of sex chromosomes across diverse songbirds. *Nature Ecology &*  
959 *Evolution* 3:834.
- 960 Xu, L., S. Y. Wa Sin, P. Grayson, S. V. Edwards, and T. B. Sackton. 2019b. Evolutionary dynamics of  
961 sex chromosomes of paleognathous birds. *Genome Biology and Evolution* 11:2376-2390.
- 962 Yang, Z. 2007. PAML 4: phylogenetic analysis by maximum likelihood. *Molecular Biology and*  
963 *Evolution* 24:1586-1591.
- 964 Yano, A., R. Guyomard, B. Nicol, E. Jouanno, E. Quillet, C. Klopp, C. Cabau et al. 2012. An immune-  
965 related gene evolved into the master sex-determining gene in rainbow trout, *Oncorhynchus*  
966 *mykiss*. *Current Biology* 22:1423-1428.
- 967 Yoshida, K., T. Makino, and J. Kitano. 2017. Accumulation of deleterious mutations on the Neo-Y  
968 chromosome of Japan Sea Stickleback (*Gasterosteus nipponicus*). *Journal of Heredity* 108:63-68.
- 969 Yoshida, K., T. Makino, K. Yamaguchi, S. Shigenobu, M. Hasebe, M. Kawata, M. Kume et al. 2014. Sex  
970 chromosome turnover contributes to genomic divergence between incipient stickleback species.  
971 *PLoS Genetics* 10:e1004223.
- 972 Zhou, Q., J. Zhang, D. Bachtrog, N. An, Q. Huang, E. D. Jarvis, M. T. P. Gilbert et al. 2014. Complex  
973 evolutionary trajectories of sex chromosomes across bird taxa. *Science* 346:1246338.
- 974
